# Supplementary material for: Efficacy and safety of diclofenac in osteoarthritis: Results of a network meta-analysis of unpublished legacy studies
Source: publisher site journal article supplement (doi:10.1016/j.sjpain.2017.03.006), 2017-04-22

A. Evidence base network for VAS pain CFB at 2 weeks


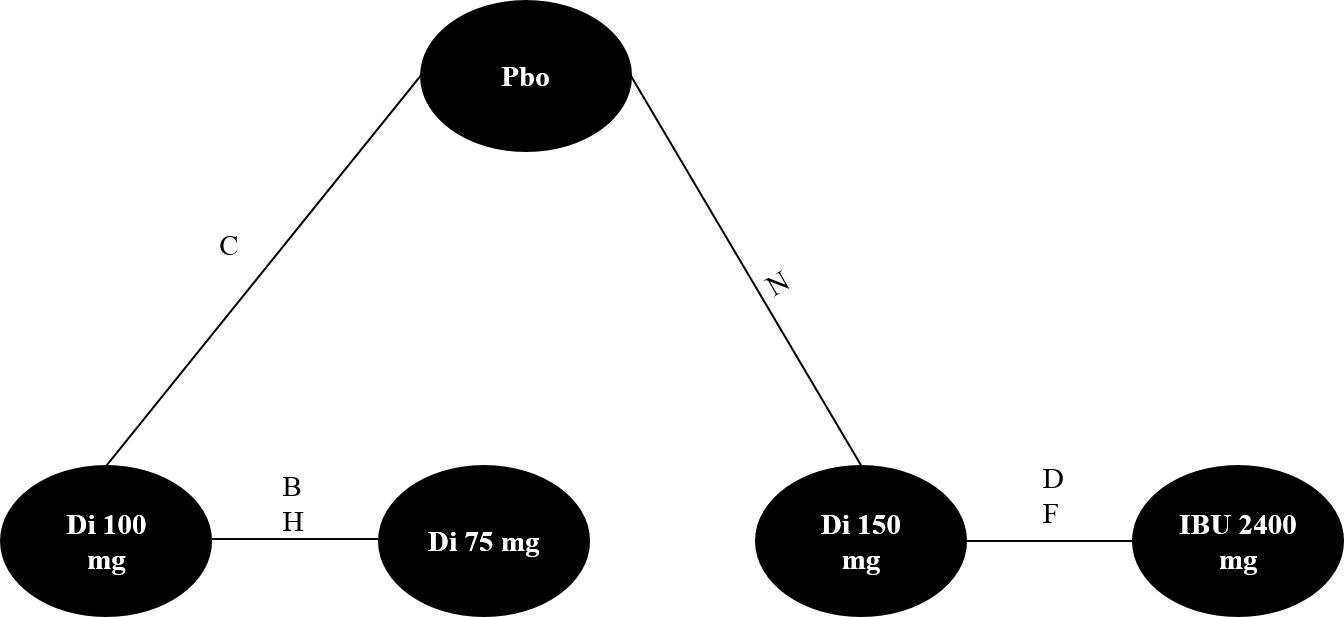


B. Evidence base network for VAS pain CFB at 4 weeks


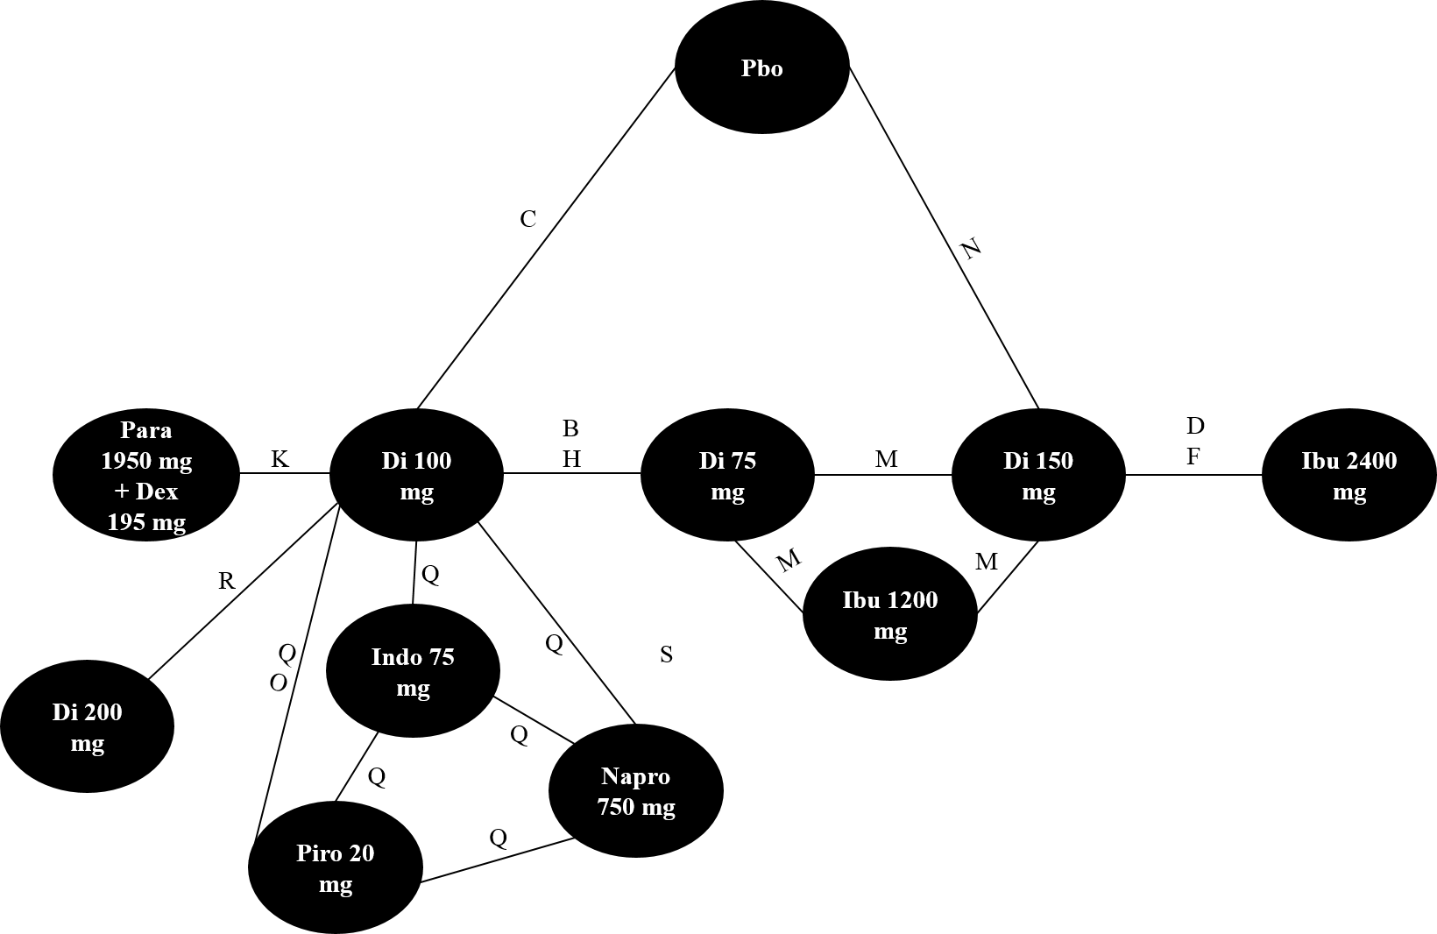


C. Evidence base network for VAS pain CFB at 12 weeks


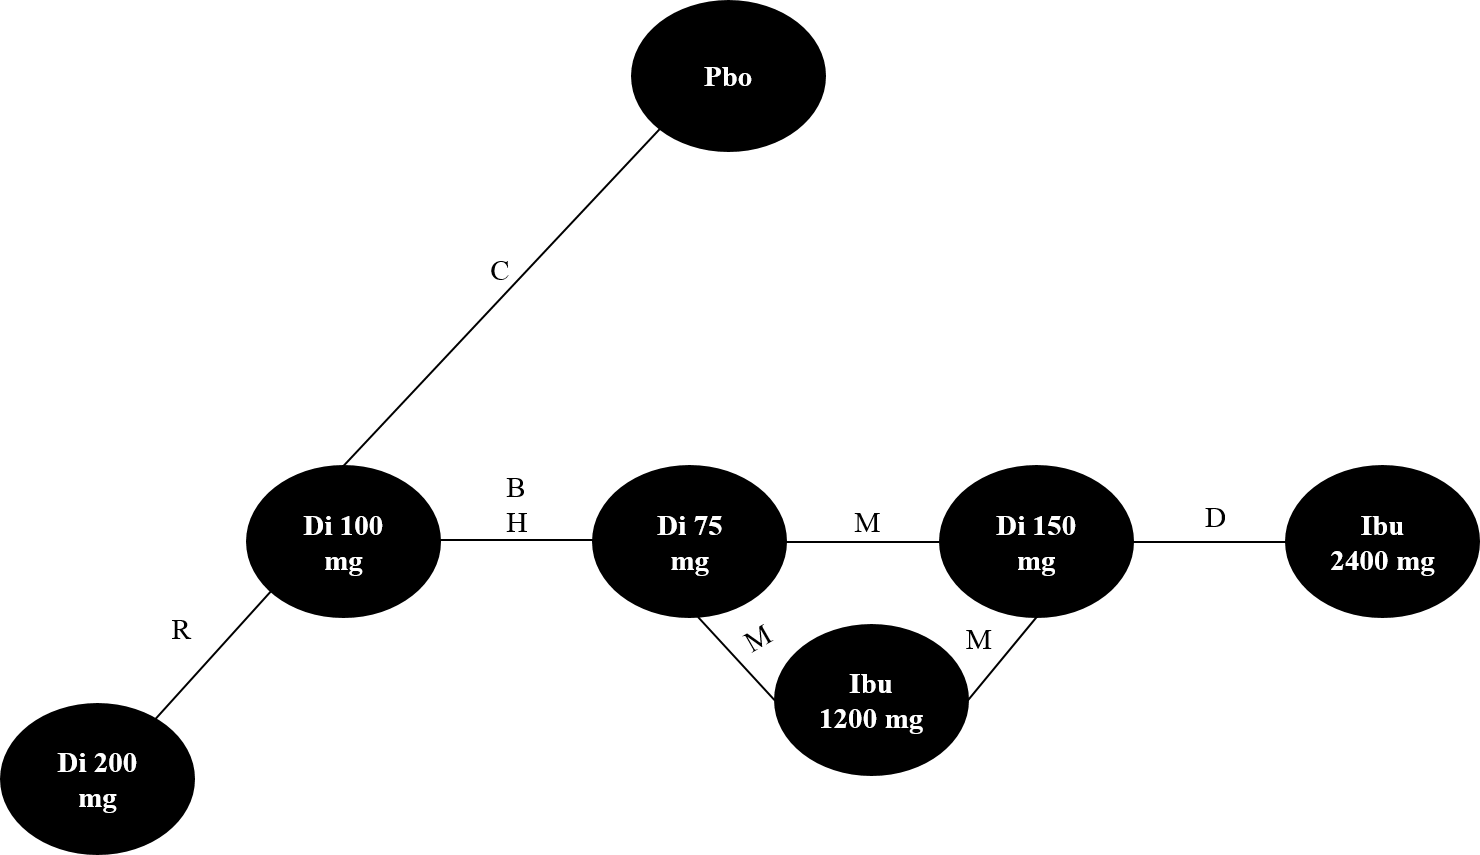


D. Evidence base network for PGA CFB at 4 weeks


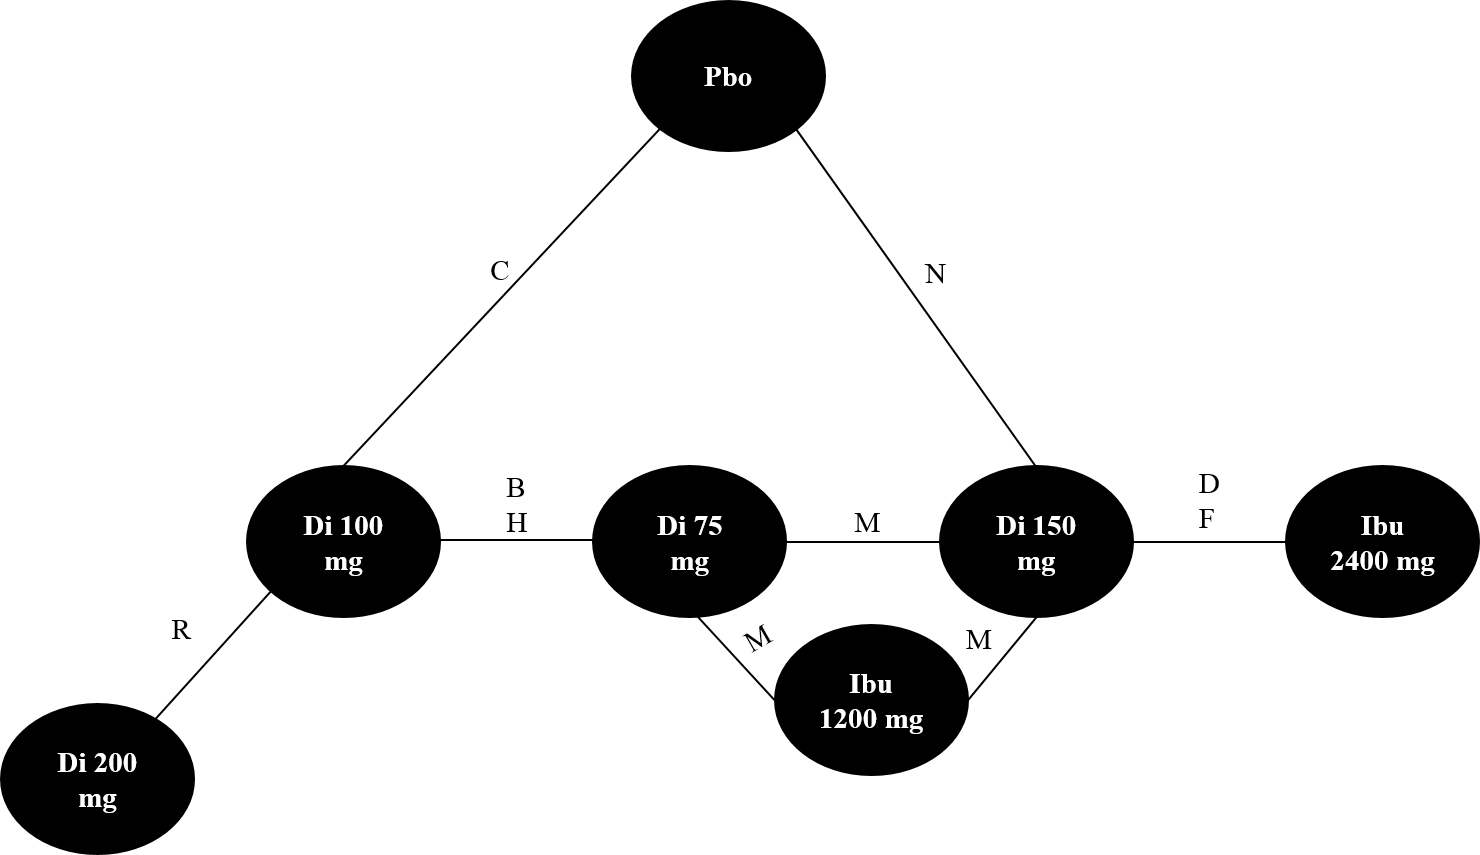


E. Evidence base network for PGA CFB at 12 weeks


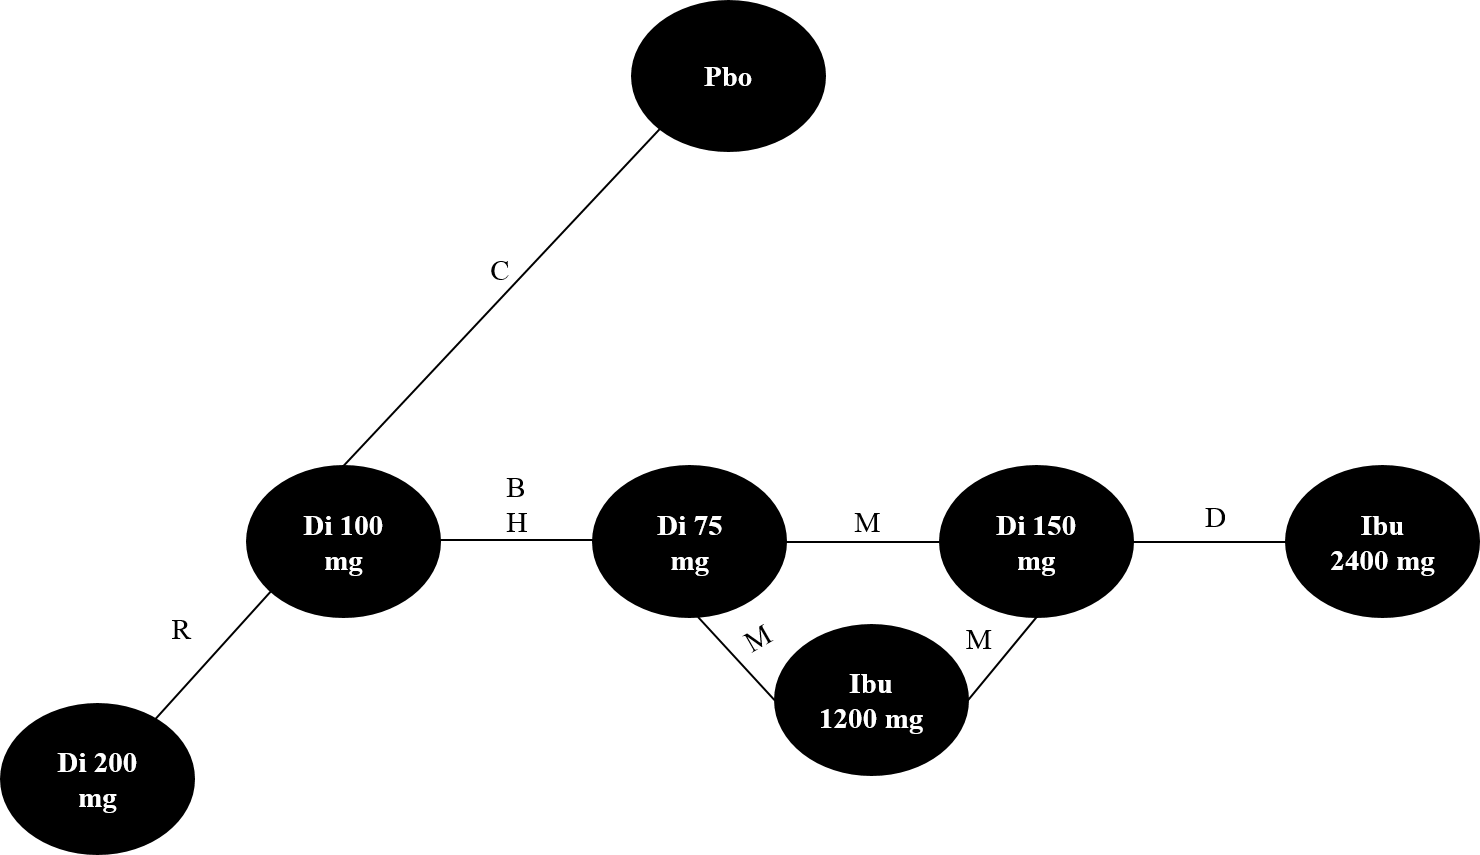


F. Evidence base network for IGA CFB at 4 weeks


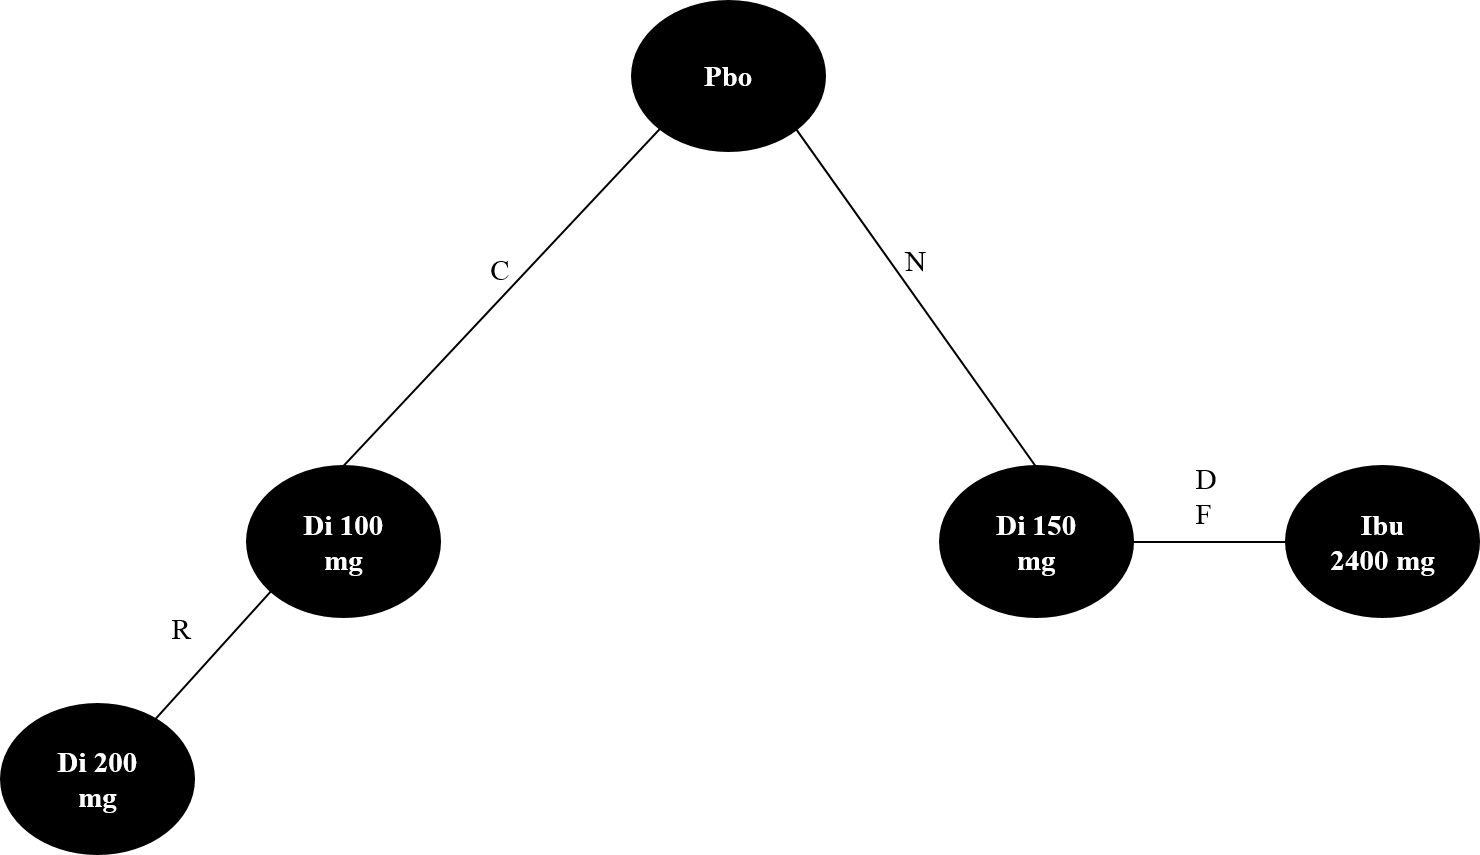


G. Evidence base network for withdrawals due to all causes


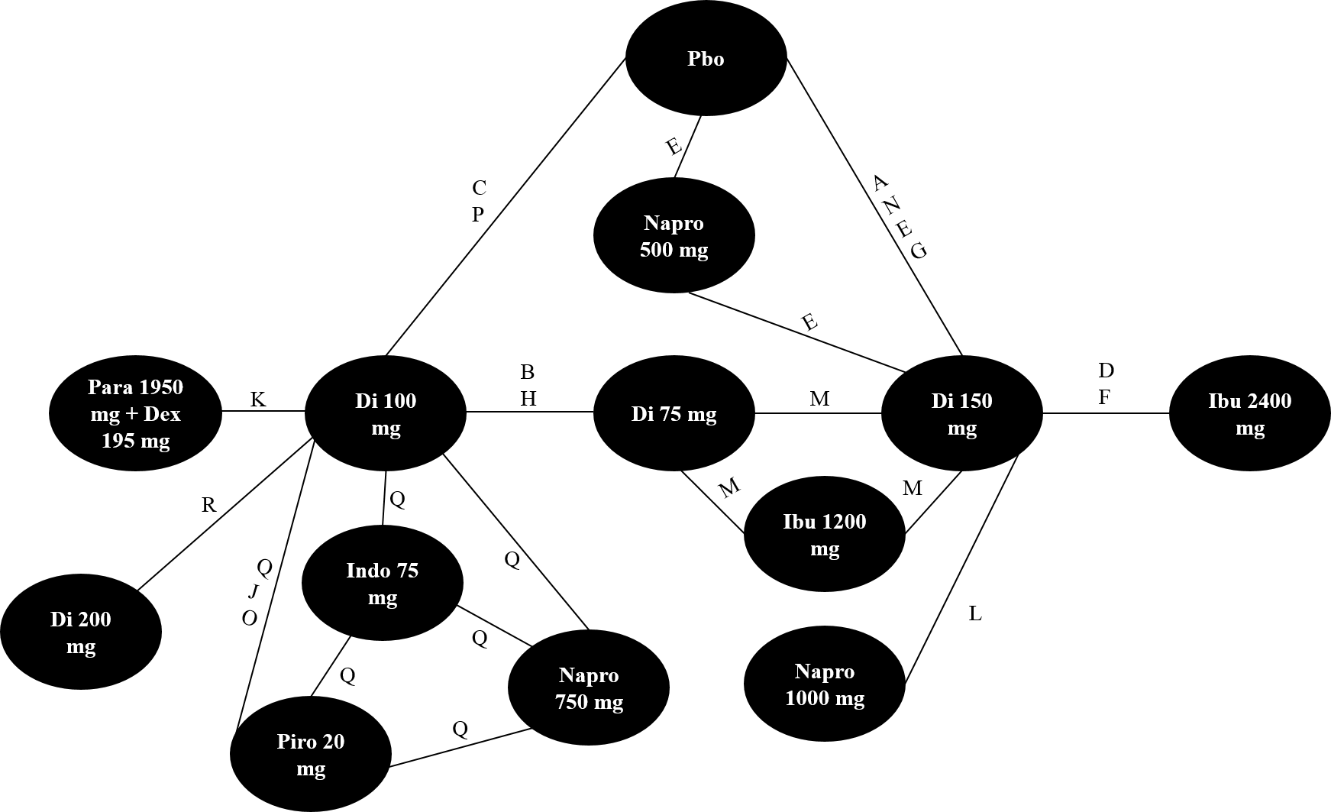


H. Evidence base network for withdrawals due to lack of efficacy


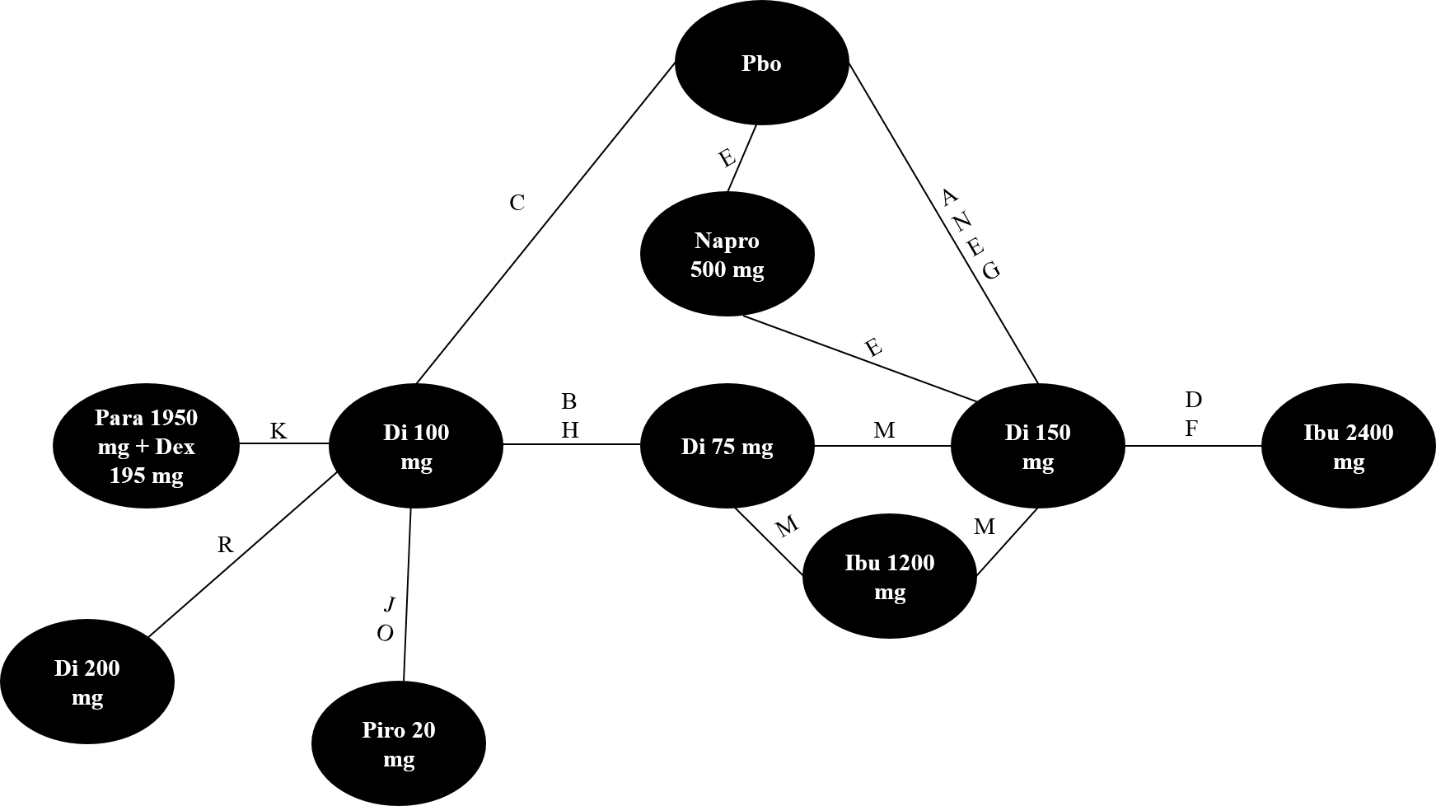


I. Evidence base network for withdrawals due to adverse events


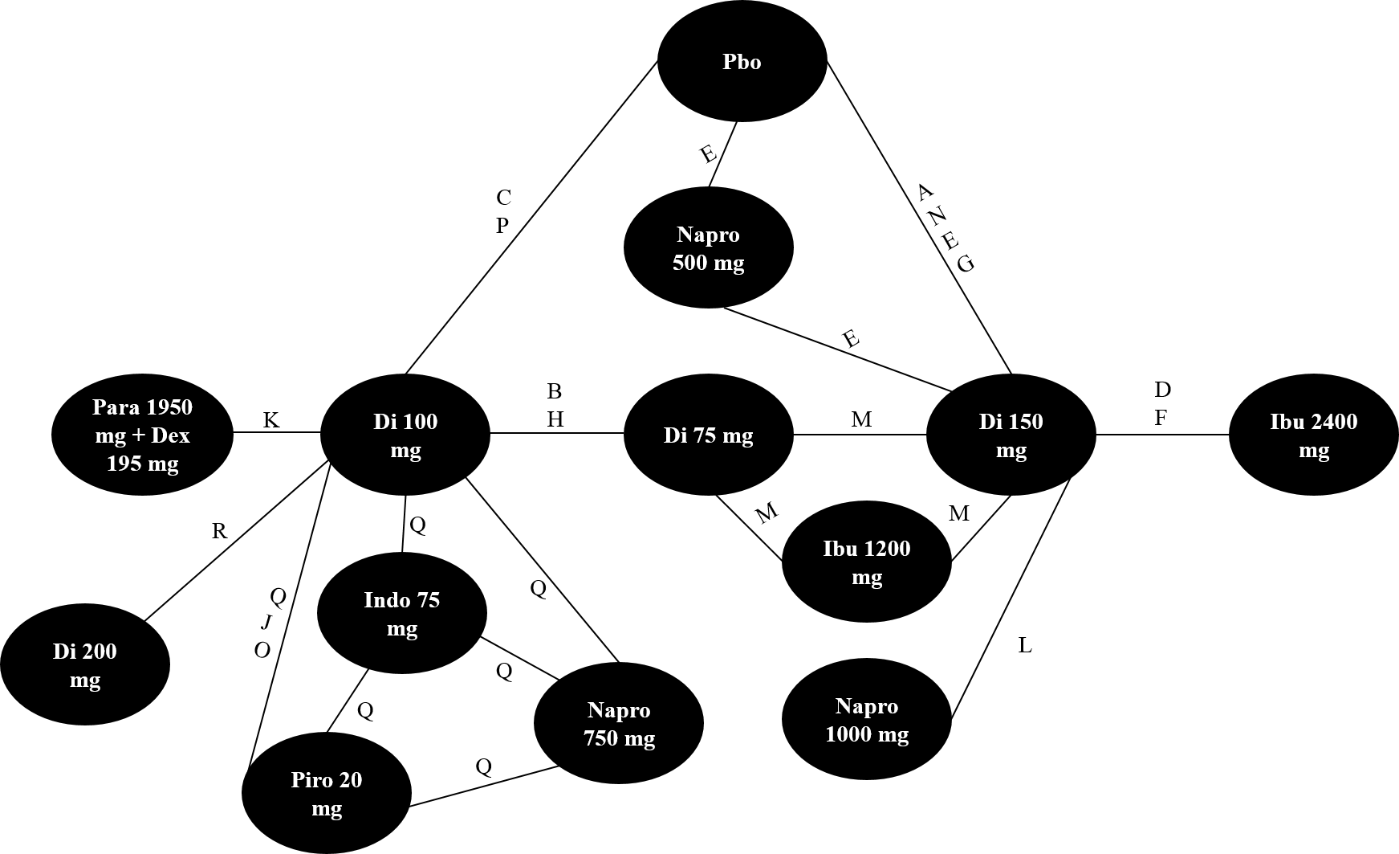


J. Evidence base network for serious adverse events


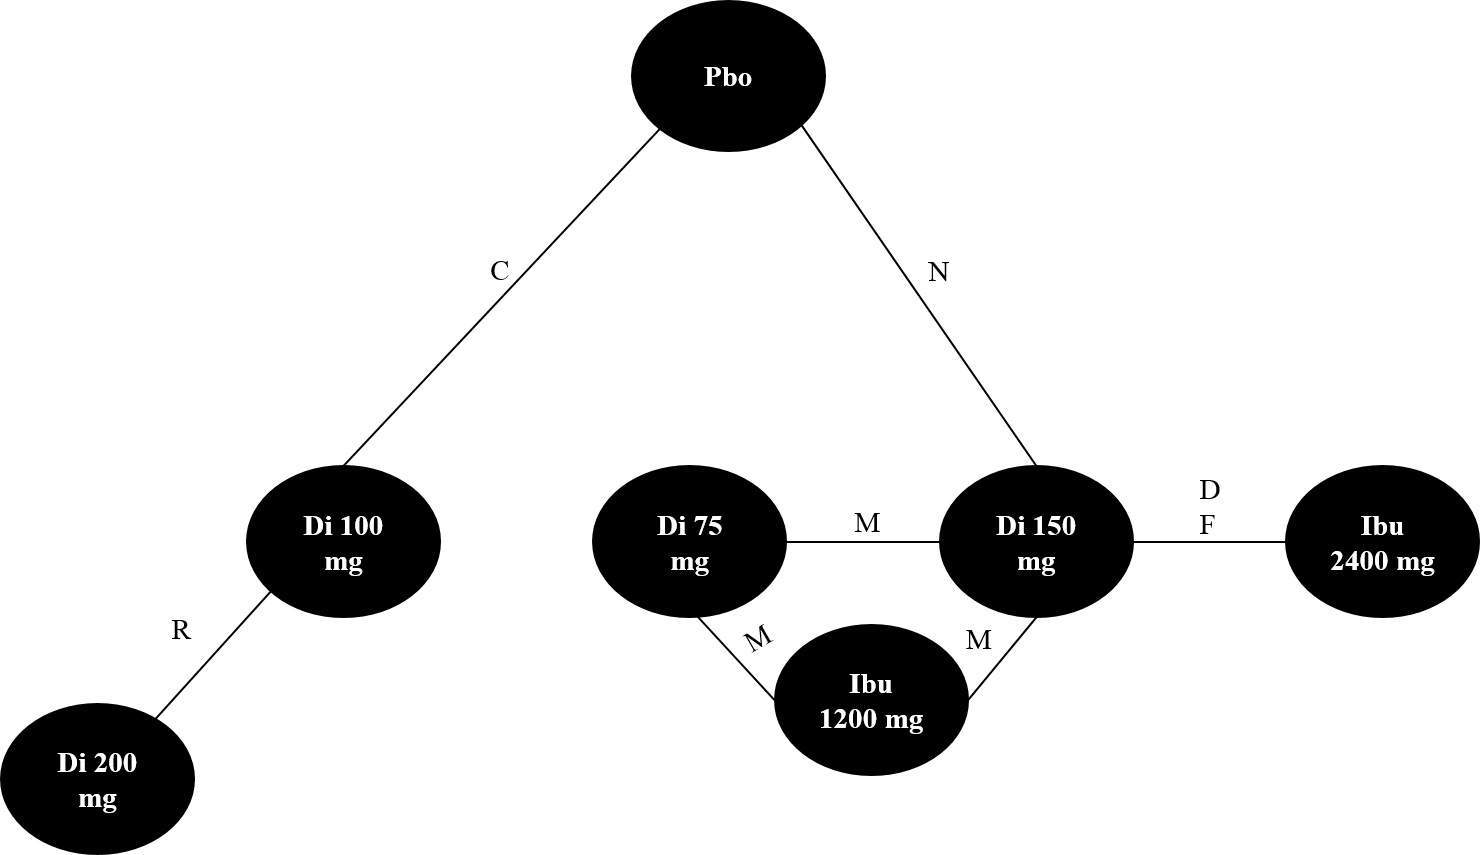

Supplement: Supplementary file 8 [file Appendix_6.docx]
