# Supplementary material for: Efficacy and safety of diclofenac in osteoarthritis: Results of a network meta-analysis of unpublished legacy studies
Source: publisher site journal article supplement (doi:10.1016/j.sjpain.2017.03.006), 2017-04-22
Supplement: Supplementary file 1 [file Appendix_1.docx]

A. Eligibility criteria used in the review of the CSRs

| Criteria | Inclusion | Exclusion |
| --- | --- | --- |
| Population | Patients with osteoarthritis | Patients with rheumatoid arthritis or other conditions |
| Intervention | - Diclofenac - Any other competitors for OA   All dosing schemes are of interest. | Any interventions not listed under inclusion |
| Comparator | Studies that compare treatments of interest (above) with placebo or to each other | Any comparators not listed under inclusion |
|
| Outcomes | Efficacy outcomes   - Pain - Physical functioning - Patient global assessment - Investigator global assessment   Safety outcomes   - Tolerability - Adverse events | Any outcomes not listed under inclusion |
| Study design | Randomized controlled trials | Any design not listed under inclusion |

B. Extra exclusion criteria for the NMA

| CSRs not included in the NMA | Reason for exclusion | Details |
| --- | --- | --- |
| 1 | Comparison not of interest | Different diclofenac tablet formulation |
| 2 |
| 3 | Different diclofenac daily frequency |
| 4 |
| 5 |
| 6 |
| 7* | Comparison not of interest | Different diclofenac salts (sodium, potassium or resinate) |
| 8 | Study design not of interest | Depending on the efficacy results, the dose is increased for some of the patients |
| 9 |
| 10 |
| *Included in scenario analysis | | |
