# Supplementary material for: Efficacy and safety of diclofenac in osteoarthritis: Results of a network meta-analysis of unpublished legacy studies
Source: publisher site journal article supplement (doi:10.1016/j.sjpain.2017.03.006), 2017-04-22
Supplement: Supplementary file 2 [file Appendix_10.docx]

**Serious adverse events summary by system organ classification level**

| Treatment arms | Serious CV events | | Serious GI events | | Renal events | | Hepatic events | | Deaths | |
| --- | --- | --- | --- | --- | --- | --- | --- | --- | --- | --- |
| **n** | **py** | **n** | **py** | **n** | **py** | **n** | **py** | **n** | **py** |
| Placebo | 2 | 27 | 1 | 27 | 0 | 0 | 0 | 0 | 0 | 37 |
| Naproxen 500 mg | 0 | 0 | 0 | 0 | 0 | 0 | 0 | 0 | 0 | 0 |
| Naproxen 750 mg | 0 | 0 | 0 | 0 | 0 | 0 | 0 | 0 | 0 | 0 |
| Naproxen 1000 mg | 0 | 0 | 0 | 0 | 0 | 0 | 0 | 0 | 0 | 27 |
| Ibuprofen 1200 mg | 0 | 0 | 1 | 80 | 0 | 0 | 0 | 0 | 0 | 80 |
| Ibuprofen 2400 mg | 2 | 90 | 2 | 90 | 0 | 0 | 0 | 0 | 1 | 107 |
| Piroxicam 20 mg | 0 | 0 | 0 | 0 | 0 | 0 | 0 | 0 | 1 | 23 |
| Indomethacin 75 mg | 0 | 0 | 0 | 0 | 0 | 0 | 0 | 0 | 0 | 0 |
| Paracetamol 1950 mg + dextropropoxyphene 195 mg | 0 | 0 | 0 | 0 | 0 | 0 | 0 | 0 | 0 | 29 |
| Diclofenac 75 mg | 0 | 0 | 3 | 79 | 0 | 0 | 0 | 0 | 1 | 79 |
| Diclofenac 100 mg | 4 | 56 | 4 | 56 | 1 | 24 | 1 | 24 | 2 | 136 |
| Diclofenac 150 mg | 7 | 197 | 9 | 222 | 1 | 90 | 0 | 0 | 0 | 249 |
| Diclofenac 200 mg | 3 | 30 | 7 | 60 | 0 | 0 | 0 | 0 | 0 | 60 |

n, absolute number of events; py, total number of person-years; CV, cardiovascular; GI, gastrointestinal
