# Supplementary material for: Efficacy and safety of diclofenac in osteoarthritis: Results of a network meta-analysis of unpublished legacy studies
Source: publisher site journal article supplement (doi:10.1016/j.sjpain.2017.03.006), 2017-04-22
Supplement: Supplementary file 3 [file Appendix_11.docx]

**Efficacy outcomes**

Efficacy endpoints for visual analogue scale (VAS) pain were considered at 2, 4, and 12 weeks for change from baseline (CFB) in VAS pain. Diclofenac 150 mg/day was likely to be more efficacious than piroxicam 20 mg/day, indomethacin 75 mg/day and paracetamol 1950 + dextropropoxyphene 195 mg/day at 4 weeks. The efficacy of diclofenac 150 and 100 mg/day was comparable to that of naproxen 750 mg/day at 4 weeks. Diclofenac 100 mg/day was likely to be favorable versus paracetamol 1950 + dextropropoxyphene 195 mg/day and indomethacin 75 mg/day, but comparable to piroxicam 20 mg/day at 4 weeks (Fig. 1).

**Fig. 1. Relative efficacy of diclofenac in terms of pain VAS difference in change from baseline (CFB) at 2, 4, and 12 weeks**

| **A** |
| --- |
| **B** |
| dex, dextropropoxyphene; Di, diclofenac; Ibu, ibuprofen; Indo, indomethacin; Napro, naproxen; Para, paracetamol; Pbo, placebo; Piro, piroxicam VAS, visual analogue scale |

**Tolerability outcomes**

Withdrawals due to all causes with diclofenac were comparable to those with naproxen. There were weak indications that piroxicam 20 mg/day may cause fewer withdrawals due to all causes compared to diclofenac 150 and 100 mg/day; however considering the number of simultaneous comparisons made, the relatively small number of patients involved and the fact that the studies where piroxicam was included were of somewhat shorter duration on an average than all studies, this statement is somewhat uncertain. Withdrawals due to all causes with diclofenac 150 and 100 mg/day were comparable to those with indomethacin 75 mg/day and paracetamol 1950 + dextropropoxyphene 195 mg/day (Fig. 2).

Diclofenac 150 mg/day was likely to result in less withdrawals due to lack of efficacy versus those with naproxen and was comparable to those with piroxicam 20 mg/day and paracetamol 1950 + dextropropoxyphene 195 mg/day. Withdrawals due to lack of efficacy with diclofenac 100 mg/day were less than those with naproxen and were comparable to those with piroxicam 20 mg/day and paracetamol 1950 + dextropropoxyphene 195 mg/day (Fig. 3).

Withdrawals due to AEs with diclofenac 150 and 100 mg/day was likely to result in more withdrawals to those with piroxicam 20 mg/day and were comparable to those with naproxen, indomethacin 75 mg/day and paracetamol 1950 + dextropropoxyphene 195 mg/day (Fig. 4).

**Fig.2. Forest plots of relative tolerability: withdrawals due to all causes**

| **A** |
| --- |
| **B** |
| dex, dextropropoxyphene; Di, diclofenac; Ibu, ibuprofen; Indo, indomethacin; Napro, naproxen; Para, paracetamol; Pbo, placebo; Piro, piroxicam |

**Fig. 3. Forest plots of relative tolerability: withdrawals due to lack of efficacy**

| **A** |
| --- |
| **B** |
| dex, dextropropoxyphene; Di, diclofenac; Ibu, ibuprofen; Indo, indomethacin; Napro, naproxen; Para, paracetamol; Pbo, placebo; Piro, piroxicam |

**Fig. 4. Forest plots of relative tolerability: withdrawal due to AEs**

| **A** |
| --- |
| **B** |
| dex, dextropropoxyphene; Di, diclofenac; Ibu, ibuprofen; Indo, indomethacin; Napro, naproxen; Para, paracetamol; Pbo, placebo; Piro, piroxicam |
