# Supplementary material for: Efficacy and safety of diclofenac in osteoarthritis: Results of a network meta-analysis of unpublished legacy studies
Source: publisher site journal article supplement (doi:10.1016/j.sjpain.2017.03.006), 2017-04-22
Supplement: Supplementary file 4 [file Appendix_2.docx]

Input data

A. VAS pain data used in the NMA

| **CSR name** | **Treatment arms** | **Mean CFB at 2 weeks** | **SE at 2 weeks** | **Mean CFB at 4 weeks** | **SE at 4 weeks** | **Mean CFB at 12 weeks** | **SE at 12 weeks** |
| --- | --- | --- | --- | --- | --- | --- | --- |
| A | Diclofenac 150 mg | NR | NR | NR | NR | NR | NR |
| Placebo | NR | NR | NR | NR | NR | NR |
| B | Diclofenac 75 mg | -21.9 | 2.49 | -24.4 | 2.59 | -29.4 | 2.43 |
| Diclofenac 100 mg | -25.6 | 2.52 | -29.1 | 2.57 | -34.9 | 2.48 |
| C | Diclofenac 100 mg | 1.00 | 2.34 | -2.0 | 2.42 | -2.0 | 2.51 |
| Diclofenac 100 mg | 2.00 | 2.28 | 0.0 | 2.30 | -1.0 | 2.52 |
| Placebo | 12.0 | 2.39 | 5.0 | 2.57 | 6.0 | 2.90 |
| D | Diclofenac 150 mg | -31.3 | 1.50 | -32.7 | 1.62 | -35.7 | 1.99 |
| Diclofenac 150 mg | -29.0 | 1.45 | -27.7 | 1.64 | -35.8 | 2.07 |
| Ibuprofen 2400 mg | -27.3 | 1.39 | -27.2 | 1.39 | -32.6 | 2.08 |
| E | Diclofenac 150 mg | NR | NR | NR | NR | NR | NR |
| Naproxen 500 mg | NR | NR | NR | NR | NR | NR |
| Placebo | NR | NR | NR | NR | NR | NR |
| F | Diclofenac 150 mg | -29.5 | 2.39 | -34.4 | 2.10 | NR | NR |
| Ibuprofen 2400 mg | -33.9 | 2.41 | -35.8 | 2.30 | NR | NR |
| G | Diclofenac 150 mg | NR | NR | NR | NR | NR | NR |
| Placebo | NR | NR | NR | NR | NR | NR |
| H | Diclofenac 75 mg | -27.9 | 2.24 | -29.0 | 2.24 | -31.4 | 2.24 |
| Diclofenac 100 mg | -27.4 | 2.19 | -26.5 | 2.19 | -30.1 | 2.19 |
| I | Diclofenac 100 mg | NR | NR | NR | NR | NR | NR |
| Piroxicam 20 mg | NR | NR | NR | NR | NR | NR |
| J | Diclofenac 100 mg | NR | NR | NR | NR | NR | NR |
| Piroxicam 20 mg | NR | NR | NR | NR | NR | NR |
| K | Diclofenac 100 mg | NR | NR | -27.0 | 1.24 | NR | NR |
| Paracetamol 1950 mg + dextropropoxyphene 195 mg | NR | NR | -22.7 | 1.25 | NR | NR |
| L | Diclofenac 150 mg | NR | NR | NR | NR | NR | NR |
| Naproxen 1000 mg | NR | NR | NR | NR | NR | NR |
| M | Diclofenac 75 mg | NR | NR | -28.0 | 1.35 | -28.0 | 1.41 |
| Diclofenac 150 mg | NR | NR | -32.0 | 1.87 | -31.0 | 2.03 |
| Ibuprofen 1200 mg | NR | NR | -23.0 | 1.25 | -25.0 | 1.40 |
| N | Diclofenac 150 mg | -30.4 | 2.39 | -17.7 | 2.59 | NR | NR |
| Placebo | -13.7 | 2.27 | -26.3 | 2.51 | NR | NR |
| O | Diclofenac 100 mg | NR | NR | -21.4 | 3.03 | NR | NR |
| Piroxicam 20 mg | NR | NR | -19.9 | 2.96 | NR | NR |
| P | Diclofenac 100 mg | NR | NR | NR | NR | NR | NR |
| Placebo | NR | NR | NR | NR | NR | NR |
| Q | Diclofenac 100 mg | NR | NR | -30.4 | 6.89 | NR | NR |
| Piroxicam 20 mg | NR | NR | -30.9 | 7.61 | NR | NR |
| Indomethacin 75 mg | NR | NR | -25.4 | 7.61 | NR | NR |
| Naproxen 750 mg | NR | NR | -27.3 | 7.22 | NR | NR |
| R | Diclofenac 100 mg | NR | NR | -31.5 | 1.86 | -29.2 | 2.05 |
| Diclofenac 200 mg | NR | NR | -28.3 | 1.80 | -30.0 | 2.03 |
| Diclofenac 200 mg | NR | NR | -32.4 | 1.77 | -34.5 | 1.91 |
| S | Diclofenac 100 mg | NR | NR | NR | NR | NR | NR |
| Naproxen 1000 mg | NR | NR | NR | NR | NR | NR |

*CFB, change from baseline; NR, not reported; SE, standard error*

B. VAS patient global assessment used in the NMA

| **CSR name** | **Treatment arms** | **Mean CFB at 4 weeks** | **SE at 4 weeks** | **Mean CFB at 12 weeks** | **SE at 12 weeks** |
| --- | --- | --- | --- | --- | --- |
| A | Diclofenac 150 mg | NR | NR | NR | NR |
| Placebo | NR | NR | NR | NR |
| B | Diclofenac 75 mg | -14.79 | 2.45 | -19.83 | 2.31 |
| Diclofenac 100 mg | -18.36 | 2.44 | -22.13 | 2.35 |
| C | Diclofenac 100 mg | -1.00 | 2.29 | -1.00 | 2.38 |
| Diclofenac 100 mg | -1.00 | 2.18 | -1.00 | 2.38 |
| Placebo | 7.00 | 2.44 | 4.00 | 2.75 |
| D | Diclofenac 150 mg | -32.20 | 1.56 | -35.20 | 1.98 |
| Diclofenac 150 mg | -30.80 | 1.70 | -34.40 | 1.91 |
| Ibuprofen 2400 mg | -29.20 | 1.40 | -32.10 | 2.01 |
| E | Diclofenac 150 mg | NR | NR | NR | NR |
| Naproxen 500 mg | NR | NR | NR | NR |
| Placebo | NR | NR | NR | NR |
| F | Diclofenac 150 mg | -34.30 | 2.2 | NR | NR |
| Ibuprofen 2400 mg | -35.00 | 2.4 | NR | NR |
| G | Diclofenac 150 mg | NR | NR | NR | NR |
| Placebo | NR | NR | NR | NR |
| H | Diclofenac 75 mg | -23.90 | 2.12 | -24.10 | 2.12 |
| Diclofenac 100 mg | -26.10 | 2.07 | -27.80 | 2.07 |
| I | Diclofenac 100 mg | NR | NR | NR | NR |
| Piroxicam 20 mg | NR | NR | NR | NR |
| J | Diclofenac 100 mg | NR | NR | NR | NR |
| Piroxicam 20 mg | NR | NR | NR | NR |
| K | Diclofenac 100 mg | NR | NR | NR | NR |
| Paracetamol 1950 mg + dextropropoxyphene 195 mg | NR | NR | NR | NR |
| L | Diclofenac 150 mg | NR | NR | NR | NR |
| Naproxen 1000 mg | NR | NR | NR | NR |
| M | Diclofenac 75 mg | -26.00 | 1.24 | -25.00 | 1.36 |
| Diclofenac 150 mg | -30.00 | 1.79 | -28.00 | 1.88 |
| Ibuprofen 1200 mg | -22.00 | 1.25 | -24.00 | 1.40 |
| N | Diclofenac 150 mg | -27.80 | 2.63 | NR | NR |
| Placebo | -12.50 | 2.56 | NR | NR |
| O | Diclofenac 100 mg | NR | NR | NR | NR |
| Piroxicam 20 mg | NR | NR | NR | NR |
| P | Diclofenac 100 mg | NR | NR | NR | NR |
| Placebo | NR | NR | NR | NR |
| Q | Diclofenac 100 mg | NR | NR | NR | NR |
| Piroxicam 20 mg | NR | NR | NR | NR |
| Indomethacin 75 mg | NR | NR | NR | NR |
| Naproxen 750 mg | NR | NR | NR | NR |
| R | Diclofenac 100 mg | -28.90 | 1.67 | -26.70 | 1.85 |
| Diclofenac 200 mg | -28.10 | 1.89 | -30.10 | 2.22 |
| Diclofenac 200 mg | -32.40 | 1.71 | -34.20 | 1.77 |
| S | Diclofenac 100 mg | NR | NR | NR | NR |
| Naproxen 1000 mg | NR | NR | NR | NR |

*CFB, change from baseline; NR, not reported; SE, standard error*

C. VAS investigator global assessment used in the NMA

| **CSR name** | **Treatment arms** | **Mean CFB at 4 weeks** | **Standard error at 4 weeks** |
| --- | --- | --- | --- |
| A | Diclofenac 150 mg | NR | NR |
| Placebo | NR | NR |
| B | Diclofenac 75 mg | NR | NR |
| Diclofenac 100 mg | NR | NR |
| C | Diclofenac 100 mg | -1.00 | 2.05 |
| Diclofenac 100 mg | 0.00 | 1.95 |
| Placebo | 6.00 | 2.18 |
| D | Diclofenac 150 mg | -27.20 | 1.36 |
| Diclofenac 150 mg | -26.20 | 1.40 |
| Ibuprofen 2400 mg | -25.20 | 1.24 |
| E | Diclofenac 150 mg | NR | NR |
| Naproxen 500 mg | NR | NR |
| Placebo | NR | NR |
| F | Diclofenac 150 mg | -34.40 | 2.00 |
| Ibuprofen 2400 mg | -34.50 | 2.30 |
| G | Diclofenac 150 mg | NR | NR |
| Placebo | NR | NR |
| H | Diclofenac 75 mg | NR | NR |
| Diclofenac 100 mg | NR | NR |
| I | Diclofenac 100 mg | NR | NR |
| Piroxicam 20 mg | NR | NR |
| J | Diclofenac 100 mg | NR | NR |
| Piroxicam 20 mg | NR | NR |
| K | Diclofenac 100 mg | NR | NR |
| Paracetamol 1950 mg + dextropropoxyphene 195 mg | NR | NR |
| L | Diclofenac 150 mg | NR | NR |
| Naproxen 1000 mg | NR | NR |
| M | Diclofenac 75 mg | NR | NR |
| Diclofenac 150 mg | NR | NR |
| Ibuprofen 1200 mg | NR | NR |
| N | Diclofenac 150 mg | -23.80 | 2.25 |
| Placebo | -13.10 | 2.58 |
| O | Diclofenac 100 mg | NR | NR |
| Piroxicam 20 mg | NR | NR |
| P | Diclofenac 100 mg | NR | NR |
| Placebo | NR | NR |
| Q | Diclofenac 100 mg | NR | NR |
| Piroxicam 20 mg | NR | NR |
| Indomethacin 75 mg | NR | NR |
| Naproxen 750 mg | NR | NR |
| R | Diclofenac 100 mg | -28.20 | 1.42 |
| Diclofenac 200 mg | -27.30 | 1.51 |
| Diclofenac 200 mg | -31.50 | 1.51 |
| S | Diclofenac 100 mg | NR | NR |
| Naproxen 1000 mg | NR | NR |

*CFB, change from baseline; NR, not reported; VAS, visual analogue scale*

D. Withdrawal outcomes as reported in the individual studies

| CSR name | Treatment arms | Withdrawals due to all causes | | | Withdrawals due to AE | | | Withdrawals due to lack of efficacy | | |
| --- | --- | --- | --- | --- | --- | --- | --- | --- | --- | --- |
| n | Person-years | Events per person-year | n | Person-years | Event per person-years | n | Person-years | Events per person-year |
| A | Diclofenac 150 mg | 10 | 3 | 3.61 | 2 | 3 | 0.72 | 6 | 3 | 2.17 |
| Placebo | 12 | 3 | 4.73 | 2 | 3 | 0.79 | 9 | 3 | 3.55 |
| B | Diclofenac 75 mg | 19 | 22 | 0.88 | 7 | 22 | 0.32 | 3 | 22 | 0.14 |
| Diclofenac 100 mg | 17 | 20 | 0.86 | 7 | 20 | 0.35 | 4 | 20 | 0.20 |
| C | Diclofenac 100 mg | 25 | 26 | 0.95 | 12 | 26 | 0.46 | 5 | 26 | 0.19 |
| Diclofenac 100 mg | 26 | 27 | 0.95 | 8 | 27 | 0.29 | 11 | 27 | 0.40 |
| Placebo | 47 | 27 | 1.73 | 4 | 27 | 0.15 | 37 | 27 | 1.36 |
| D | Diclofenac 150 mg | 89 | 90 | 0.98 | 31 | 90 | 0.34 | 21 | 90 | 0.23 |
| Diclofenac 150 mg | 104 | 91 | 1.14 | 31 | 91 | 0.34 | 34 | 91 | 0.37 |
| Ibuprofen 2400 mg | 89 | 91 | 0.98 | 21 | 91 | 0.23 | 41 | 91 | 0.45 |
| E | Diclofenac 150 mg | 20 | 18 | 1.11 | 7 | 18 | 0.39 | 11 | 18 | 0.61 |
| Naproxen 500 mg | 28 | 18 | 1.58 | 5 | 18 | 0.28 | 16 | 18 | 0.90 |
| Placebo | 37 | 18 | 2.09 | 6 | 18 | 0.34 | 23 | 18 | 1.30 |
| F | Diclofenac 150 mg | 22 | 17 | 1.31 | 12 | 17 | 0.72 | 3 | 17 | 0.18 |
| Ibuprofen 2400 mg | 27 | 17 | 1.60 | 9 | 17 | 0.53 | 9 | 17 | 0.53 |
| G | Diclofenac 150 mg | 16 | 8 | 1.90 | 3 | 8 | 0.36 | 11 | 8 | 1.31 |
| Placebo | 41 | 8 | 4.94 | 1 | 8 | 0.12 | 32 | 8 | 3.85 |
| H | Diclofenac 75 mg | 35 | 24 | 1.44 | 8 | 24 | 0.33 | 9 | 24 | 0.37 |
| Diclofenac 100 mg | 36 | 26 | 1.41 | 6 | 26 | 0.23 | 9 | 26 | 0.35 |
| I | Diclofenac 100 mg | 0 | 3 | 0.00 | 0 | 3 | 0.00 | 0 | 3 | 0.00 |
| Piroxicam 20 mg | 0 | 3 | 0.00 | 0 | 3 | 0.00 | 0 | 3 | 0.00 |
| J | Diclofenac 100 mg | 42 | 24 | 1.75 | 24 | 24 | 1.00 | 9 | 24 | 0.38 |
| Piroxicam 20 mg | 26 | 23 | 1.15 | 14 | 23 | 0.62 | 8 | 23 | 0.35 |
| K | Diclofenac 100 mg | 57 | 29 | 1.99 | 39 | 29 | 1.36 | 7 | 29 | 0.24 |
| Paracetamol 1950 mg + dextropropoxyphene 195 mg | 65 | 29 | 2.21 | 42 | 29 | 1.43 | 9 | 29 | 0.31 |
| L | Diclofenac 150 mg | 17 | 26 | 0.66 | 13 | 26 | 0.50 | NR | 26 | NR |
| Naproxen 1000 mg | 13 | 27 | 0.49 | 10 | 27 | 0.38 | NR | 27 | NR |
| M | Diclofenac 75 mg | 83 | 80 | 1.04 | 37 | 80 | 0.46 | 18 | 80 | 0.23 |
| Diclofenac 150 mg | 59 | 42 | 1.39 | 27 | 42 | 0.64 | 11 | 42 | 0.26 |
| Ibuprofen 1200 mg | 109 | 81 | 1.35 | 43 | 81 | 0.53 | 31 | 81 | 0.38 |
| N | Diclofenac 150 mg | 16 | 7 | 2.21 | 13 | 7 | 1.80 | 0 | 7 | 0.00 |
| Placebo | 12 | 7 | 1.61 | 4 | 7 | 0.54 | 6 | 7 | 0.80 |
| O | Diclofenac 100 mg | 15 | 7 | 2.19 | 10 | 7 | 1.46 | 1 | 7 | 0.15 |
| Piroxicam 20 mg | 7 | 7 | 1.05 | 4 | 7 | 0.60 | 2 | 7 | 0.30 |
| P | Diclofenac 100 mg | 5 | 2 | 2.83 | 2 | 2 | 1.13 | NR | 2 | NR |
| Placebo | 3 | 2 | 1.77 | 0 | 2 | 0.00 | NR | 2 | NR |
| Q | Diclofenac 100 mg | 0 | 1 | 0.00 | 0 | 1 | 0.00 | NR | 1 | NR |
| Piroxicam 20 mg | 1 | 1 | 1.30 | 1 | 1 | 1.30 | NR | 1 | NR |
| Indomethacin 75 mg | 1 | 1 | 1.30 | 1 | 1 | 1.30 | NR | 1 | NR |
| Naproxen 750 mg | 0 | 1 | 0.00 | 0 | 1 | 0.00 | NR | 1 | NR |
| R | Diclofenac 100 mg | 46 | 30 | 1.52 | 18 | 30 | 0.60 | 10 | 30 | 0.33 |
| Diclofenac 200 mg | 44 | 30 | 1.48 | 23 | 30 | 0.77 | 5 | 30 | 0.17 |
| Diclofenac 200 mg | 37 | 30 | 1.21 | 12 | 30 | 0.39 | 5 | 30 | 0.16 |
| S | Diclofenac 100 mg | NR | 3 | NR | NR | 3 | NR | NR | 3 | NR |
| Naproxen 1000 mg | NR | 4 | NR | NR | 4 | NR | NR | 4 | NR |

*AE, adverse event; CSR, clinical study report; NR, not reported*

E. Safety outcomes as reported in the individual studies

| CSR name | Treatment arms | Person-years | Serious adverse events | Serious adverse events per person-years | Serious CV events | Serious GI events | Renal events | Hepatic events | deaths |
| --- | --- | --- | --- | --- | --- | --- | --- | --- | --- |
| A | Diclofenac 150 mg | 3 | NR | NR | NR | NR | NR | NR | 0 |
| Placebo | 3 | NR | NR | NR | NR | NR | NR | 0 |
| B | Diclofenac 75 mg | 22 | 0 | 0.00 | NR | NR | NR | NR | NR |
| Diclofenac 100 mg | 20 | 0 | 0.00 | NR | NR | NR | NR | NR |
| C | Diclofenac 100 mg | 26 | 5 | 0.19 | 2 | 2 | NR | NR | 1 |
| Diclofenac 100 mg | 27 | 1 | 0.04 | NR | NR | NR | NR | 0 |
| Placebo | 27 | 4 | 0.15 | 2 | 1 | NR | NR | 0 |
| D | Diclofenac 150 mg | 90 | 13 | 0.14 | 2 | 3 | 1 | NR | 0 |
| Diclofenac 150 mg | 90 | 10 | 0.11 | 4 | 5 | NR | NR | 0 |
| Ibuprofen 2400 mg | 90 | 8 | 0.09 | 2 | 2 | NR | NR | 1 |
| E | Diclofenac 150 mg | 18 | NR | NR | NR | NR | NR | NR | NR |
| Naproxen 500 mg | 18 | NR | NR | NR | NR | NR | NR | NR |
| Placebo | 18 | NR | NR | NR | NR | NR | NR | NR |
| F | Diclofenac 150 mg | 17 | 3 | 0.18 | 1 | NR | NR | NR | 0 |
| Ibuprofen 2400 mg | 17 | 3 | 0.18 | NR | NR | NR | NR | 0 |
| G | Diclofenac 150 mg | 8 | NR | NR | NR | NR | NR | NR | NR |
| Placebo | 8 | NR | NR | NR | NR | NR | NR | NR |
| H | Diclofenac 75 mg | 24 | NR | NR | NR | NR | NR | NR | NR |
| Diclofenac 100 mg | 26 | NR | NR | NR | NR | NR | NR | NR |
| I | Diclofenac 100 mg | 3 | NR | NR | NR | NR | NR | NR | NR |
| Piroxicam 20 mg | 3 | NR | NR | NR | NR | NR | NR | NR |
| J | Diclofenac 100 mg | 24 | NR | NR | NR | NR | 1 | 1 | 0 |
| Piroxicam 20 mg | 23 | NR | NR | NR | NR | NR | NR | 1 |
| K | Diclofenac 100 mg | 29 | NR | NR | NR | NR | NR | NR | 1 |
| Paracetamol 1950 mg + dextropropoxyphene 195 mg | 29 | NR | NR | NR | NR | NR | NR | 0 |
| L | Diclofenac 150 mg | 26 | 1 | 0.04 | NR | 1 | NR | NR | 0 |
| Naproxen 1000 mg | 27 | NR | NR | NR | NR | NR | NR | 0 |
| M | Diclofenac 75 mg | 79 | 9 | 0.11 | NR | 3 | NR | NR | 1 |
| Diclofenac 150 mg | 42 | 4 | 0.09 | NR | 1 | NR | NR | 0 |
| Ibuprofen 1200 mg | 80 | 11 | 0.14 | NR | 1 | NR | NR | 0 |
| N | Diclofenac 150 mg | 7 | 0 | 0.00 | NR | NR | NR | NR | 0 |
| Placebo | 7 | 1 | 0.13 | NR | NR | NR | NR | 0 |
| O | Diclofenac 100 mg | 7 | NR | NR | NR | NR | NR | NR | NR |
| Piroxicam 20 mg | 7 | NR | NR | NR | NR | NR | NR | NR |
| P | Diclofenac 100 mg | 2 | NR | NR | NR | NR | NR | NR | NR |
| Placebo | 2 | NR | NR | NR | NR | NR | NR | NR |
| Q | Diclofenac 100 mg | 1 | NR | NR | NR | NR | NR | NR | NR |
| Piroxicam 20 mg | 1 | NR | NR | NR | NR | NR | NR | NR |
| Indomethacin 75 mg | 1 | NR | NR | NR | NR | NR | NR | NR |
| Naproxen 750 mg | 1 | NR | NR | NR | NR | NR | NR | NR |
| R | Diclofenac 100 mg | 30 | 6 | 0.20 | 2 | 2 | NR | NR | 0 |
| Diclofenac 200 mg | 30 | 10 | 0.34 | 3 | 3 | NR | NR | 0 |
| Diclofenac 200 mg | 30 | 6 | 0.20 | NR | 4 | NR | NR | 0 |
| S | Diclofenac 100 mg | 3 | NR | NR | NR | NR | NR | NR | NR |
| Naproxen 1000 mg | 4 | NR | NR | NR | NR | NR | NR | NR |

*CSR, clinical study report; CV, cardiovascular; GI, gastrointestinal; NR, not reported*
