# Supplementary material for: Efficacy and safety of diclofenac in osteoarthritis: Results of a network meta-analysis of unpublished legacy studies
Source: publisher site journal article supplement (doi:10.1016/j.sjpain.2017.03.006), 2017-04-22
Supplement: Supplementary file 5 [file Appendix_3.docx]

A. Study design of CSRs retrieved for data extraction but not included in the NMA base case

| CSR ID | Name of interventions | Total dose per day | Administration frequency | Formulation | Study design | Centres | Study location | Year of start date | Trial duration in days | Main inclusion criteria | Main exclusion criteria | |
| --- | --- | --- | --- | --- | --- | --- | --- | --- | --- | --- | --- | --- |
| 1 | Diclofenac sodium | 100 mg | OD | sustained release tablet | RCT, AC, DB, MC | 8 | Canada | 1987 | 84 | - OA of the knee characterized by: 1) radiologic evidence of degenerative joint disease; 2) at least moderate pain on movement of the affected knee requiring analgesic or anti-inflammatory medication; 3) limitation of range of movement and inactivity stiffness. - stable OA for three months prior to inclusion in this study, defined as: 1) there has been no major increase in the maximum pain experienced at rest or with activity; 2) there has been no appreciable increase in swelling or effusion; 3) there has been no major change in the range of movement nor increase in the duration of inactivity stiffness. - both sex - 65 years or older - functional status: ARA class II or III. - Medication: Must have required and been on an equivalent dose of indomethacin, naproxen, ibuprofen, sulindac, ketoprofen, fenoprofen, tolmetin, flurbiprofen or ASA for the control of their osteoarthritis of the knee for at least 1 month prior to enrollment. | - Physiological states - previous and/or concomitant medical conditions: hypersensitivity to either of the study medications or cross-sensitivity to ASA, or other non-steroidal anti-inflammatory agents - renal/hepatic disease; patients with severe hepatic or renal disease with laboratory evaluations of function greater than 40% above the upper limit of the normal range - other conditions; recent myocardial infarction, cardiac arrhythmias, congestive heart failure, hematologic disorders and bleeding diatheses, peptic ulcer disease, gastritis or other abnormalities of the upper gastrointestinal tract, regional enteritis, ulcerative colitis, asthma or severe chronic obstructive lung disease, epilepsy, parkinsonism or psychosis, arthritis from any other cause - previous illness; patients who have had a major systemic illness, including infection or surgery within the previous three months - patients who have been receiving long biological half-life (>20 hrs. i.e. piroxicam) NSAIDs or diclofenac - patients who received corticosteroids (by oral, IM or intra-articular routes within 6 weeks) analgesic medications (inlcuding ASA/salicyclic acid formulations) other than the study and rescue medications, or anti-coagulants - patients receiving other forms of therapy such as physiotherapy, if this therapy is expected to vary during the study. | |
| Diclofenac sodium | 100 mg | BID | immediate release tablet |  |  |  |  |  |
| 2 | Diclofenac sodium | 75 mg | OD | sustained release tablet | RCT, AC, DB, MC, DD | 11 | Canada | 1987 | 42 | -Male and surgically sterile or postmenopausal females aged 18 years or over - mild to moderate OA of the knee or hip characterized by: 1) radiologic evidence of degenerative joint disease; 2) at least mild pain on movement (untreated) of the affected joint requiring analgesic or anti-inflammatory medication; 3) limitation of range of movement and inactivity stiffness - stable OA for three months prior to inclusion in this study, defined as: 1) there has been no major increase in the maximum pain experienced at rest or with activity; 2) there has been no appreciable increase in swelling or effusion; 3) there has been no major change in the range of movement nor increase in the duration of inactivity stiffness - functional status: ARA class I or II. - Medication: Must have required treatment with diclofenac NA or other NSAID for the control of their OA at least one month prior to enrollment in the study - Patients who were taking a pure analgesic treatment (e.g. floctafenine, acetaminophen) for at least one month prior to study enrollment were also eligible | - Patients with:  Definite or classical RA; Clinical and serological picture compatible with systemic lupus erythematosus; Histological evidence of RA; Clinical picture, muscle enzymes and/or biopsy consistent with myositis; Definite scleroderma or CRST variant; Picture of rheumatic fever; gouty arthritis or tophi; infectious arthritis; Sjogren's syndrome; Reiter's Syndrome; neurogenic arthrophathy; homogentisic acid in urine; sarcoid or positive K veim test; multiple myeloma,leukemia or lymphoma; erythema nodosum; ankylosing spondylitis; psoriasis or psoriatic arthritis; chondrocalcinosis; aseptic necrosis; polymyalgia rheumatica; anaphylactoid purpura; latex fixation titer greater than 1:60 or a positive FANA; metabolic bone disease; ulcerative colitis; regional enteritis. - Patients with hypersensitivity or intolerance to the study medication or other NSAIDs - Patients with abnormal renal function or patients with severe hepatic disease  - Patients with a history of other medical conditions for which the study medications were contraindicated: a) MI within previous 6 months; Cardiac arrhythmias; Congestive heart failure; hematologic disorders and bleeding diatheses; peptic ulcer disease or other upper GI abnormalities; regional enteritis or Crohn's disease; ulcerative colitis; asthma or severe chronic obstructive lung disease; epilepsy, parkinsonism or psychosis; arthritis from any other cause. - Drug exclusions within 6 weeks: corticosteroids, analgesic medication other than study and rescue medication, anti-coagulants, lithium, long biological half-life NSAIDs, other investigational drugs - Patients with physiotherapy likely to vary during the study - Patients for which definitive therapy would be delayed by inclusion in the study - Patients with a history of surgery with placement of a prosthetic device in the joint under study | |
| Diclofenac sodium | 75 mg | TID | enteric coated |  |  |  |  |  |
| 3 | Diclofenac sodium | 150 mg | BID | sustained release tablet | RCT, AC, DB, MC | 11 | Canada | 1987 | 42 | - Male or female patients - 18 to 65 years of age - At entry, all patients displayed clinical evidence of severe osteoarthritis of the knee or hip, characterized by all of the following: a) radiological evidence of degenerative joint disease, including joint space narrowing, subchondral bony sclerosis, bone cysts, or gross deformity and sublaxation and/or loose bodies; b) at least severe pain on movement of the affected joint requiring analgesic or anti-inflammatory medication, and c) limitation of range of movement and inactivity stiffness. - The patient’s osteoarthritis must have been relatively stable for the three months prior to inclusion in the study. Stable disease was defined as an affected joint in which there had been: a) No major increase in the maximum pain experienced at rest or with activity b) No appreciable increase in swelling or effusion c) No major change in the range of movement nor increase in the duration of inactivity stiffness.  - Patients belonging to ARA Class III or IV were eligible to participate in the study. - Patients must have required treatment with diclofenac Na or other NSAID for the control of their osteoarthritis for at least one month prior to enrollment in the study. Alternatively, patients who were taking a pure analgesic treatment (e.g. floctafenine, acetaminophen) for at least one month prior to study enrollment were also eligible. | - Patients exhibiting any of the following:  definite or classical rheumatoid arthritis, clinical and serological picture compatible with systemic lupus erythematosus, histologic evidence of rheumatoid arthritis, clinical picture, muscle enzymes and/or biopsy consistent with myositis, definite scleroderma or CRST variant, rheumatic fever, gouty arthritis or tophi, infectious arthritis, Sjorgen’s Syndrome, Reiter’s Syndrome, neurogenic arthrophathy, homogentisic acid in the urine, histological evidence of sarcoid or positive K veim test, evidence of multiple myeloma, leukemia or lymphoma, characteristic skin lesions of erythema nodosum, ankylosing spondylitis, psoriasis or psoriatic arthritis, chondrocalcinosis (pseudogout), aseptic necrosis (acute phase), polymyalgia rheumatic, anaphylactoid purpura, latex fixation titer greater than 1:60 or a positive FANA, metabolic bone disease, ulcerative colitis, regional enteritis. - Patients in an acute phase of their osteoarthritis  - Known hypersensitivity or intolerance to either of the study medications or cross-sensitivity to ASA or other non-steroidal anti-inflammatory agents. - Abnormality of renal function, severe hepatic disease with laboratory evaluation of function greater than 40% above the upper limit of the normal range. - Patients with a history of other medical conditions: Myocardial infarction within previous six months, Cardiac arrhythmias, including bradycardia, tachycardia, paroxysmal atrial tachycardia, palpitations, atrial fibrillation, frequent extrasystoles, and premature ventricular contraction, congestive heart failure, hematologic disorders and bleeding diatheses, Peptic ulcer disease or other major abnormalities of the upper gastrointestinal tract which require or have required treatment, Regional enteritis or Crohn’s disease, ulcerative colitis, asthma or severe chronic obstructive lung disease, epilepsy, parkinsonism or psychosis, arthritis from any other cause - Patients who had suffered from major systemic illnesses, including infection or surgery within the previous three months were also excluded. - Drug exclusions included receipt of the following medications: corticosteroids by oral, IM or intra-articular routes within 6 weeks, analgesic medications including ASA/salicyclic acid formulations other than the study and rescue medications, anti-coagulants, lithium, long biological half-life non-steroidal anti-inflammatory drugs (i.e. piroxicam), or other investigational drugs | |
| Diclofenac sodium | 150 mg | TID | enteric coated |  |  |  |  |  |
| 4 | Diclofenac sodium | 100/150 mg | BID/TID | enteric coated | RCT, AC, DB, MC | 24 | US | 1983 | 84 | - Outpatients of both sexes - Age 40 to 75 inclusive - Patients with a diagnosis of OA of the hip, who have required regular treatment with aspirin and/or other NSAIDs for the control of the signs or symptoms of their disease, for at least three months prior to enrollment in the trial - Patients must belong to ARA functional Class II or III - Patients on physiotherapy may be included, provided the program is not changed during the trial - Patients must have evidence of active disease during the placebo washout period to qualify for entry into the double-blind phase of the study  - Patients with the diagnosis of primary osteoarthritis or secondary osteoarthritis of the hip due to trauma, slipped femoral epiphysis. The acute disease leading to secondary OA must have occurred at least five years prior to entry into the study | - Patients with arthritis due to any other etiology - Candidates for joint replacement - Patients who do not show evidence of active disease upon completion of two weeks placebo washout period. A minimum of 48 hours placebo washout is required - Patients who have: Active peptic ulcer, current gastritis, regional enteritis or ulcerative colitis. history of recurrent peptic ulcer and either gastrectomy or significant gastrointestinal bleeding, presence of a malabsorption syndrome or disease, as well as an ileal shunt or any form of intestinal by-pass operation, Cirrhosis, hepatitis, and any other infectious disease involving the liver, including conditions significantly affecting hepatic function such as hepatic failure, drug-induced hepatotoxicity and conditions causing biliary obstruction. Laboratory values in excess of 30% above the upper limit of the normal range for the following tests: SGOT, LDH, Alkaline Phosphatase, Bilirubin (total), Uremia, chronic glomerulonephritis, nephrosis, obstruction of the urinary tract, any form of pyelonephritis, and laboratory values in excess of 30% above the upper limit of the normal range for the following tests: serum uric acid, serum creatinine, Recent myocardial infarction (less than 3 months); uncontrolled: congestive cardiac failure, hypertension diabetes mellitus, coronary artery disease. A history of hemorrhagic diathesis or agranulocytosis, Uncontrolled hypo- or hyperthyroidism; adrenal insufficiency (Addison's Disease), A major systemic infection or major surgery during the previous three months, Concomitant use of anticoagulants, Diabetes mellitus treated with insulin or oral hypoglycemic agents - Hypersensitivity, or who develop attacks of asthma, urticaria, or acute rhinitis, following treatment with aspirin or other agents with prostaglandin synthetase inhibiting activity - Require other analgesic or anti-inflammatory agents, or corticosteroids, orally or intra-articularly  - Patients whose serum salicylate level is >10 mg during or upon completion of the placebo washout period  - Patients who received local corticosteroid injections for the treatment of OA less than 3 months prior to entry into this study - The patient's joint to be evaluated should not have been partially or totally subjected to joint replacement surgery | |
| Aspirin | 2400/3600 mg | QID |  |  |  |  |  |  |
| 5 | Diclofenac sodium | 100/150 mg | BID (100mg/day) TID (150mg/day) | enteric coated | RCT, AC, DB, MC | 24 | US | 1980 | 84 | - Outpatients of both sexes, - 40 to 75 inclusive, - Patients with a diagnosis of OA of the knee, who have required regular treatment with aspirin and/or other NSAID's for the control of the signs or symptoms of their disease, for at least three months prior to enrollment in the trial. - Patients must belong to ARA functional Class II or III - Patients on physiotherapy may be included, provided the program is not changed during the trial - Patients must have evidence of active disease during the placebo washout period to qualify for entry into the double-blind phase of the study, - Patients with the diagnosis of primary osteoarthritis or secondary osteoarthritis of the knee due to trauma or any condition leading to OA of the knee. The acute disease leading to secondary OA must have occurred at least five years prior to entry into the study. | | Same as 11 |
| Aspirin | 2400/3600 mg | QID | tablet |  |  |  |  |  |
| 6 | Diclofenac sodium | 150 mg | TID | dispersible | RCT, AC, DB, MC | 9 | Germany | 1990 | 84 | -Cooperative, adult, male or female outpatients up to the age of 70 years - complained of pain in the knee and/or hip for a duration exceeding 3 months - had radiographic evidence of osteoarthritis on X-Rays taken immediately prior to the commencement of the study or on an earlier occasion but within the past one year - had moderate to severe intensity of pain at rest and/or during activity (≥ 50 mm on a 100 mm visual analogue scale) as assessed by the patient - required prolonged treatment with NSAIDs in the judgement of the investigator | -physiological states, previous and/or concomitant illnesses; - Arthritis of any origin other than osteoarthrosis - Known hypersensitivity to the active substance or history of precipitation of asthma, rhinitis, urticaria or anaphylactic reaction following intake of aspirin or other cyclo-oxygenase inhibitors - Presence or suspicion of gastro-duodenal ulcer of history of gastro-intestinal bleeding at any time or other gastro-intestinal diseases such as ulcerative colitis, malabsorption syndrome, oesophageal varices, etc. - Presence of severe cardiac, hepatic or renal insufficiency - Severe hypertension - Haemopoietic or bleeding disorders - previous and/or concomitant treatment with corticosteroid therapy (systemic or intra-articular) within two months of entrance into the study, administration of other analgesic/anti-inflammatory drugs including corticosteroids (oral or intra-articular) during the trial, intake of NSAIDs during the last 3/7 days prior to entry into the study (paracetamol permitted up to 4 g/day during this period), non-drug therapy viz. physiotherapy, massage, etc. to be avoided during the trial; however, if such treatment was warranted, it was to remain constant for the two weeks before and throughout the trial | |
| Diclofenac sodium | 150 mg | TID | enteric coated |  |  |  |  |  |
| 7 | Diclofenac sodium | 150 mg | TID | dispersible | RCT, AC, DB, MC | 16 | France | 1989 | 84 | same as DIDS3 | same as DIDS3 | |
| Diclofenac sodium | 150 mg | TID | enteric coated |  |  |  |  |  |
| 8 | Diclofenac resinate | 150 mg | BID | capsule | RCT, AC, DB, MC | 9 | NR | 1986 | 28 | - Cooperative adult male and female out-patients, with roentgenologically confirmed and extremely painful osteoarthritis of the knee and/or hip and requiring treatment with a non-steroidal anti-inflammatory agent, were admitted to the study.  - Before start of treatment the pain on passive movement at the extremes of the range of movement of the clinically worst affected joint had to be very severe.  - Additional analgesic or antirheumatic medication was not allowed during the trial.  - If the patient was undergoing physiotherapy, treatment should have been given for a period of at least 1 month before the start of the trial and had to be maintained throughout the trial period.  - Anti-arthritic second-line therapy was allowed if it had been administered continuously for at least 3 months before the start of the trial and was maintained throughout the trial. | - Patients with gastroduodenal ulcers (in medical history, manifest or suspected) or other gastro-intestinal diseases (ulcerative colitis, malabsorption syndrome, oesophagal varices), impaired renal function, severe hepatic or cardiovascular disease, manifest diabetes mellitus, haemorrhagic diathesis, mental disturbance including drug or alcohol dependency, known hypersensitivity to diclofenac  - Patients in whom acetylsalicylic acid or other prostaglandin synthesis inhibitors had led to asthma, acute rhinitis or an anaphylactic reaction (such as urticaria) - Patients who had received intra-articular injections of corticosteroids within 6 weeks of the start of the study  - Patients with abnormalities in the haematological screen including porphyria as well as pregnant and nursing patients | |
| Diclofenac sodium | 150 mg | TID | coated tablet |  |  |  |  |  |
| 9 | Diclofenac sodium | 100 mg | OD | retard | RCT, AC, DB, MC | 8 | Finland | 1985 | 90 | Patients to whom long-term anti-inflammatory analgesic use is indicated. | Patients to whom any of the following statements apply: - hypersensitivity to anti-inflammatory analgesics - asthma - ulcers - anamnesis of ulcers - pregnancy - insufficiency of kidneys and/or liver | |
| Diclofenac sodium | 100 mg | BID | enteric coated |  |  |  |  |  |
| 10 | Diclofenac sodium | 100/150 mg | BID | tablet | RCT, AC, DB, MC | 4 | Canada | 1981 | 84 | - Outpatients of both sexes. - Age: 40 to 75 years inclusive - Patients with a diagnosis of OA of the knee who had required regular treatment with naproxen and/or other NSAIDs for the control of the signs or symptoms of their disease, for at least three months prior to enrollment in the trial. - Patients must belong to ARA functional Class II or III. - Patients on physiotherapy were included, provided the program was not changed during the trial. - Patient must have evidence of active disease to qualify for entry into the study. - Patients with the diagnosis of primary osteoarthritis or secondary osteoarthritis of the knee due to trauma or any condition leading to OA of the knee. The acute disease leading to secondary OA must have occurred at least five years prior to entry into the study. | - Patients with arthritis due to any other etiology. - Patients who were considered candidates for joint replacement. - Active peptic ulcer, current gastritis, regional enteritis or ulcerative colitis. Patients with a history of recurrent peptic ulcer and either gastrectomy or significant gastro-intestinal bleeding were not entered into the study. The presence of a malabsorption syndrome or disease, well as an ileal shunt or any form of intestinal by-pass operation, was ground for exclusion. - Cirrhosis, hepatitis, and any other infectious disease involving the liver, including conditions significantly affecting hepatic function such as hepatic failure, drug-induced hepatotoxicity, and conditions causing biliary obstruction. Laboratory values in excess of 30% above the upper limit of the normal range for the following tests were grounds for exclusion: SGOT, LDH, alkaline phosphatase, bilirubin (total) - Uremia, chronic glomerulonephritis, nephrosis, obstruction of the urinary tract, any form of pyelonephritis, and laboratory values in excess of 30% above the upper limit of the normal range for the following tests were grounds for exclusion: serum uric acid and serum creatinine - Patients who in the opinion of the investigator exhibited a clinically significant laboratory abnormality. - Recent myocardial infarction (less than 3 months) or uncontrolled: congestive cardiac failure, hypertension, diabetes mellitus, and coronary artery disease - A history of hemorrhagic diathesis or agranulocytosis. - Uncontrolled hypo- or hyperthyroidism; adrenal insufficiency (Addison's Disease). - A major systemic infection or major surgery during the previous three months. - Concomitant use of anticoagulants. - Diabetes mellitus treated with insulin or oral hypoglycemic agents.  - Patients with hypersensitivity, or who developed attacks of asthma, urticaria, or acute rhinitis, following treatment with naproxen or other agents with prostaglandin synthetase inhibiting activity. Patients who required other analgesic or anti-inflammatory agents, or corticosteroids orally or intra-articularly or aspirin-containing products, were not included in the study. However, the use of a rescue non-anti-inflammatory analgesic (e.g. acetaminophen) was allowed but not encouraged.  - Patients who received local corticosteroid injections for the treatment of OA less than 3 months prior to entry into this study. - The patient's joint to be evaluated should not have undergone partial or total joint replacement surgery. | |
| Naproxen | 500/750 mg | BID | capsule |  |  |  |  |  |  |
| *AC, active controlled; DB, double blind; DD, double dummy; DIP, distal interphalangeal joints; ECG, electrocardiogram; GP, general practice; MC, multi-centered; MCP,* *Metacarpophalangeal; NSAIDs, non-steroidal anti-inflammatory drugs; OA, osteoarthritis; RCT, randomised controlled trial; VAS, visual analogue scale* | | | | | | | | | | | | |

B. Patients’ characteristics for CSRs retrieved for data extraction but not included in the NMA base case

| CSR name | Treatment arms  (dose per day) | ITT  (n) | Mean Age  (years) | Male (%) | Type of OA (%) | | Mean duration of disease (years) | Rescue medication allowed | Discontinuation (%) |
| --- | --- | --- | --- | --- | --- | --- | --- | --- | --- |
| Hip | Knee |
| 1 | Diclofenac 100 mg | 44 | NR | 38 | 0 | 100 | NR | yes | 39 |
|  | Diclofenac 100 mg | 43 | NR | 27 | 0 | 100 | NR | yes | 42 |
| 2 | Diclofenac 75 mg | 85 | 63 | 31 | NR | NR | NR | yes | 24 |
|  | Diclofenac 75 mg | 83 | 64 | 35 | NR | NR | NR | yes | 18 |
| 3 | Diclofenac 150 mg | 81 | 58 | 38 | NR | NR | NR | yes | 19 |
|  | Diclofenac 150 mg | 84 | 57 | 42 | NR | NR | NR | yes | 23 |
| 4 | Diclofenac 100/150 mg | 78 | 61 | 39 | 100 | NR | 7.5 | NR | 24 |
|  | Aspirin 2400/3600 mg | 78 | 62 | 36 | 100 | NR | 7.3 | NR | 36 |
| 5 | Diclofenac 100/150 mg | 188 | 63 | 24 | NR | 100 | 7.9 | NR | 22 |
|  | Aspirin 2400/3600 mg | 187 | 62 | 28 | NR | 100 | 9.6 | NR | 33 |
| 6 | Diclofenac 150 mg | 67 | 58 | 39 | NR | NR | 4.5 | NR | 13 |
|  | Diclofenac 150 mg | 69 | 55 | 46 | NR | NR | 3.5 | NR | 20 |
| 7 | Diclofenac 150 mg | 62 | 63 | 19 | 24 | 76 | 4.4 | NR | 32 |
|  | Diclofenac 150 mg | 68 | 62 | 14 | 19 | 81 | 4.6 | NR | 34 |
| 8 | Diclofenac 150 mg | 60 | 62* | 37 | 33 | 67 | NR | NR | 22 |
|  | Diclofenac 150 mg | 60 | 61* | 42 | 35 | 65 | NR | NR | 15 |
| 9 | Diclofenac 100 mg | 54 | NR | 22 | NR | NR | NR | yes | 20 |
|  | Diclofenac 100 mg | 56 | NR | 14 | NR | NR | NR | NR | 25 |
| 10 | Diclofenac 100/150 mg | 33 | 64 | 42 | 0 | 100 | 6.1 | yes | 21 |
|  | Naproxen 500/750 mg | 31 | 66 | 32 | 0 | 100 | 7.4 | yes | 26 |

**Median*

*CSR, clinical study report; ITT, Intention-To-Treat; n/a, not applicable; NR, not reported;*
