# Supplementary material for: Efficacy and safety of diclofenac in osteoarthritis: Results of a network meta-analysis of unpublished legacy studies
Source: publisher site journal article supplement (doi:10.1016/j.sjpain.2017.03.006), 2017-04-22
Supplement: Supplementary file 6 [file Appendix_4.docx]

Study design of RCTs included in the NMA

| CSR ID | Name of interventions | Dose per day | Administration frequency | Formulation | Study design | Centre | Study location | Year of start date | Trial duration in days | Main inclusion criteria | Main exclusion criteria |
| --- | --- | --- | --- | --- | --- | --- | --- | --- | --- | --- | --- |
| A | Diclofenac sodium | 150 mg | TID | enteric coated | RCT, PC, DB, MC | 7 | US | 1983 | 49 | - Outpatients of both sexes - Age: 40 to 75 inclusive - Patients with a diagnosis of OA of the hip, who have required regular treatment with aspirin and/or other NSAIDs for the control of the signs or symptoms of their disease, for at least three months prior to enrollment in the trial. - Patients must belong to ARA functional Class II or III. - Patients on physiotherapy may be included, provided the program is not changed during the trial. - Patients must have evidence of active disease during the placebo washout period to qualify for entry in the double-blind phase of the study. - Patients with the diagnosis of primary osteoarthritis or secondary osteoarthritis of the hip due to trauma, slipped femoral epiphysis, or any condition leading to OA of the hip. | - Patients with arthritis due to any other etiology. - Patients who are considered as candidates for joint replacement. - Patients who do not show evidence of active disease upon completion of two weeks placebo washout period. A minimum of 48 hours placebo washout is required. |
| Placebo |  |  |  |  |  |  |  |  |
| B | Diclofenac resinate | 75 mg | OD | capsule | RCT, AC, DB, MC, DD | 14 | Germany | 1988 | 84 | - adult outpatients of either sex - very painful, radiologically established activated oseoarthritis of the knee and/or hip joint in need of long term treatment with a nonsteroidal antirheumatic - pain on passive movement in the end-phase of joint mobility was to be at least severe in the clinically most severely affected joint | - Gastroduodenal ulcers (manifest history of suspected) or other gastrointestinal disease (ulcerative colitis, malabsorption syndrome, oesophageal varices etc.) - Impaired renal function (total creatinine > 1.7 mg%, urea > 70 mg%) - Severe liver disease (gamma GT and/or transaminases increased to more than double the normal ranges, bilirubin > 1.5 mg/100 ml) - Severe cardiovascular disease - Manifest diabetes mellitus - Haemorrhagic diathesis - Clinically manifest alcoholism - Psychotic and/or neurotic conditions |
| Diclofenac sodium | 100 mg | BID | enteric coated |  |  |  |  |  |
| C | Diclofenac sodium | 100 mg | OD | slow release | RCT, PC, DB, MC | 21 | US | 1987 | 84 | - 40 to 75 years.  - male or female outpatients (visit1) - only patients with a diagnosis of osteoarthritis of the knee requiring aspirin or other non-steroidal anti-inflammatory drugs on consistent basis for at least the past 3 months could be enrolled (visit1) - patients on physiotherapy could be included provided the program was not significantly changed during the trial (visit1) - patients in functional class II or class III at visit 4. A patient confined to a wheelchair was not considered an appropriate patient for a clinical trial and could not be enrolled (visit 4) - evidence of active disease and also flare after the placebo washout period. The patient's assessments of osteoarthritis disease severity and joint pain aggravated by walking at visit 4 must have has a minimum rating of "4" (visit 4) - evidence of response to treatment with diclofenac EC 75 mg BID as shown by a decrease ≥ 2 points in the patients assessment of disease severity between visit 4 and visit 6 (visit 6) | - Treatment with diclofenac during the past 3 months (visit1) - Arthritis due to any other etiology (visit1) - Hypersensitivity, allergy to any NSAID or development of attacks of asthma, urticaria, or acute rhinitis following treatment with aspirin or other agents with cyclooxygenase-inhibiting activity (visit1) - patients who were considered candidates for joint replacement surgery (visit1) - Treatment with parenteral or intra-articular corticosteroids within the past month (visit1) - Treatment with another experimental non-approved drug or treatment with an investigational drug within the past 30 days (visit1) - History of non-compliance, alcoholism, or drug abuse (visit1) - No patient could be re-enrolled who had been previously withdrawn from the study for any reason at any point during the study (visit1) |
| Diclofenac sodium | 100 mg | BID | enteric coated |  |  |  |  |  |
| Placebo |  |  |  |  |  |  |  |  |
| D | Diclofenac potassium | 150 mg | TID | sugar coated | RCT, AC, DB, MC | 28 | US | 1988 | 168 | - Outpatients of both sexes (visit 1) - Age: 40 to 75 years inclusive (visit 1) - Patients with a diagnosis of osteoarthritis of the knee and who have required regular treatment with NSAIDs for the control of the signs and symptoms of their disease for at least three months prior to enrollment in the trial (visit 1) - Patients must belong to ARA Functional Class II or III (visit 1) - Patients on physiotherapy may be included, provided the program is not significantly changed during the trial (visit 1) - Patients must have evidence of active disease and flare during the placebo washout period to qualify for entry into the double-blind phase of the study (visit 4) - Patients must still belong to ARA Functional Class II or III (visit 4) | - Patients with arthritis due to any other etiology (visit1) - Patients who are considered as candidates for joint replacement or whose joint to be evaluated has been partially or totally subjected to joint replacement surgery (visit1) |
| Diclofenac sodium | 150 mg | TID | enteric coated |  |  |  |  |  |
| Ibuprofen | 2400mg | TID | tablet |  |  |  |  |  |
| E | Diclofenac sodium | 150 mg | BID | enteric coated | RCT, PC, DB, MC | 10 | US | 1982 | 84 | - Outpatients of either sex - Ages 40 to 75, inclusive - Primary or secondary osteoarthritis of the knee or hip having required regular treatment with an anti-inflammatory drug (for control of the signs and/or symptoms) during the three months prior to enrollment in this trial - ARA functional Class II or III - When physical therapy is part of a pre-study total regimen, that component cannot be significantly changed during the course of the trial - Increased disease activity must be demonstrable by the end of the washout period in order to qualify for entrance into the double-blind phase of this study | - Women with IUDs - Other rheumatic disorders which might interfere with assessment or interpretation of response - A pathology that might engender a related arthritis (e.g. thyroiditis, ulcerative colitis, carcinoma) - Neuropathies and neurovasculopathies which might interfere with the evaluation of pain - Known hypersensitivity to any anti-inflammatory drug, including aspirin - Treatment with I-A corticosteroids during the four weeks preceding enrollment into this study - Any two of the following laboratory values > 30% above the upper limit of normal: SGOT, total bilirubin, alkaline phosphatase |
| Naproxen | 500 mg | BID |  |  |  |  |  |  |
| Placebo |  |  |  |  |  |  |  |  |
| F | Diclofenac sodium | 150 mg | BID | enteric coated | RCT, AC, DB, MC | 11 | US | 1985 | 56 | - Outpatients of both sexes - Age: 40 to 75 inclusive - Patients with a diagnosis of osteoarthritis of the knee and who have required regular treatment with NSAIDs (including aspirin) for the control of the signs and symptoms of their disease for at least three months prior to enrollment into the trial - Patients must belong to ARA Functional Class II or III  - Patients on physiotherapy may be included, provided the program is not significantly changed during the trial - Patients must have evidence of active disease during the placebo washout period to qualify for entry into the double-blind phase of study. | - Patients with arthritis due to any other etiology. - Patients who are considered as candidates for joint replacement surgery or whose joint to be evaluated has been partially or totally subjected to joint replacement surgery - Patients who do not show worsening of active disease during a two-week placebo washout period. A minimum of 48 hours placebo washout is required. NOTE: patients whose assessment at visit 1 of osteoarthritis disease severity or joint pain aggravated by active motion is rated as "9" or "10" cannot worsen sufficiently and therefore must not be enrolled. |
| Ibuprofen | 2400mg | QID | tablet |  |  |  |  |  |
| G | Diclofenac sodium | 150 mg | TID | enteric coated | RCT, PC, DB, MC | 7 | US | 1983 | 42 | - Outpatients of both sexes, 40 to 75 years of age - Diagnosis of OA of the knee who have required regular treatment with aspririn and/or other NSAIDs for the control of the signs or symptoms of their disease, for at least three months prior to enrollment in the trial. - Must belong to ARA functional class II or III - Patients on physiotherapy may be included, provided the program is not changed during the trial. - Must have evidence of active disease during the placebo washout period to qualify for entry into the double-blind phase of the study. - Patients with the diagnosis of primary osteoarthritis or secondary osteoarthritis of the knee due to trauma or any condition leading to OA of the knee. The acute disease leading to secondary OA must have occurred at least five years prior to entry into the study. | - Patients with arthritis due to any other etiology. - Patients who are considered as candidates for joint replacement. - Patients who do not show evidence of active disease upon completion of two weeks placebo washout period. A minimum of 48 hours placebo washout is required. |
| Placebo |  |  |  |  |  |  |  |  |
| H | Diclofenac resinate | 75 mg | OD | capsule | RCT, AC, DB, MC | 33 | UK | 1990 | 84 | - Adult outpatients in the age range 18 to 75 years with radiologically confirmed OA in the hip and/or knee and complaining of pain in the joint of more than 3 months' duration. - Before the start of the therapy the visual analogue scale pain score at rest or on activity in the joint most affected had to be at least 50 mm. - Additional analgesic or anti-rheumatic medication was not permitted during the active trial period. - Patients requiring non-drug intervention e.g. physiotherapy were entered providing such intervention remained constant for 2 weeks prior to and throughout the study period. - Patients requiring concomitant medication for gastro-duodenal conditions e.g. antisecretory agents/H2 antagonists if therapy commenced at least 4 weeks pre-study and remained constant throughout. | - Arthritis of other etiology. - Hypersensitivity to the test agents; - History of gastroduodenal ulceration or bleeding - Severe cardiac insufficiency - Uncontrolled moderate or severe hypertension - Severe renal insufficiency  - Hepatic insufficiency - Haemopoietic or bleeding disorders |
| Diclofenac sodium | 100 mg | BID | enteric coated |  |  |  |  |  |
| I | Diclofenac sodium | 100 mg | OD | retard | RCT, AC, DB, SC | 1 | Brazil | 1984 | 42 | - Patients of both sexes between 18-80 years old - Clinical history in the physical examination compatible with the diagnosis of osteoarthritis (knee, hip, cervical column, or lumbar spine) - Radiologic evidence of osteoarthritis - They must have moderate to severe pain at rest or with movement, and at least one of the following joint symptoms: edema, redness, heat, or local hypersensitivity. | - Another joint disease besides osteoarthritis - Collagen disease - Prior or current peptic ulcer - Pregnancy or lactation - Neuromuscular or traumatic lumbago - Patients with severe liver or kidney disease - Patients who have used corticosteroids in the four weeks prior to the beginning of the trial - Patients using corticosteroids or non-hormonal anti-inflammatory agents - Uncooperative patients - Patients with severe arterial hypertension and/or heart failure |
| Piroxicam | 20 mg | OD |  |  |  |  |  |  |
| J | Diclofenac potassium | 100 mg | OD | retard | RCT, AC, DB, MC | NR | UK | 1984 | 84 | - Cooperative patients of both sex and aged 18 or over were - Had radiologically confirmed osteoarthritis of the knee and/or hip which required treatment with non-steroidal anti-inflammatory drugs. Patients could also have other joints involved. | - Had a history of peptic ulcer, severe dyspepsia or any sensitivity reaction (such as rash, asthma, rhinorrhoea) to diclofenac indomethacin, piroxicam or aspirin, - Had any significant systemic diseases - Required an oral anticoagulant - Were taking systemic corticosteroids or had had local injections of steroids within the previous two months. |
| Piroxicam | 20 mg | OD |  |  |  |  |  |  |
| K | Diclofenac potassium | 100 mg | OD | retard | RCT, AC,DB, MC | NR | NR | 1986 | 28 | - Had joint pain affecting not more than a total of two joints of the hip, knee, ankle or wrist. Pain had to be localized in the joint, not in the surrounding tissues, and non-traumatic in origin. - Were "new" patients, that is, they had not received treatment from their GP for the condition within the previous six months. - Were aged 40-65 inclusive. | - History of trauma to the joint within the previous six months. - Swelling of the joint due to effusion. - Acute inflammation of the joint suggesting septic arthritis or acute synovial reaction (e.g. gout, rheumatoid). - Pain affecting more than two joints, suggesting a generalized systemic disorder. - Deformity of the joint. |
| Paracetamol + dextropropoxyphene | 1950mg + 195 mg | TID |  |  |  |  |  |  |
| L | Diclofenac sodium | 150 mg | BID | tablet | RCT, AC, DB, SC | 1 | US | 1989 | 84 | - Male or female outpatients with osteoarthritis or non-systemic related musculoskeletal disorders requiring chronic NSAID therapy, - At least 55 years old - All patients must have had regular therapy with a non-steroidal anti-inflammatory drug (including OTC NSAID or aspirin) recommended by their physician at least 3 months prior to patient entry to the study. They must have been compliant with this regimen for at least 4 weeks prior to study entry. | - Any of the following diseases or conditions will not be selected for study entry: rheumatoid arthritis or other inflammatory arthritis, seronegative spondylarthropathy, mixed connective tissue disease, systemic lupus erythematosis, avascular necrosis, arthropathy associated with Paget's disease, pseudogout, ochronosis, hemochromatosis, hemophilic arthropathy, slow infections arthritis, Charcot's joint, villonodular synovitis, synovial chondromatosis, gout, Reiter's syndrome, psoriasis, rheumatic fever, sarcoidosis, inflammatory bowel disease, malabsorption syndrome or disease, ileal shunt, intestinal bypass surgery, scleroderma, dermatomyositis, polymyositis, periarteritis nodosa, agammaglobulinemia, erythema nodosum. |
| Naproxen | 1000mg | BID | capsule |  |  |  |  |  |
| M | Diclofenac potassium | 37.5mg | TID | NR | RCT, AC,SB, MC | 54 | US | 1992 | 72 | -Patients of both sexes - Age > 40 - Patients with OA of the knee: knee pain plus one of the following: a) crepitus on active motion, morning stiffness < 30 minutes; b) crepitus on active motion, morning stiffness < 30 minutes and bony enlargement; c) no crepitus, but only enlargement present. - Patients with OA of the hand: hand pain, aching or stiffness and 3 of 4 of the following: a) hard tissue enlargement of 2 or more selected joints; b) hard tissue enlargement of 2 or more DIP joints; c) fewer than 3 swollen MCP joints; d) deformity of at least 1 of 10 selected joints. - Patients with OA of the hip: hip pain and at least 2 of the following: a) ESR < 20 mm/hr; b) radiographic femoral or acetabular osteophytes; c) radiographic joint space narrowing (superior, axial, and/or medial). - Diagnosis of OA of the cervical and lumbar spine: cervical or lumbar pain and at least 2 of the following: a) narrowing of joint space; b) subchondral long sclerosis; c) marginal osteophyte formation - Medication: Must have required treatment with NSAIDs for the control of their OA at least one month prior to enrollment in the study - Patients on physiotherapy may be included, provided the program is not significantly changed during the trial. | - Patients previously treated with diclofenac - Patients with arthritis due to any other etiology - Active peptic ulcer, current gastritis, regional enteritis, ulcerative colitis; history of recurrent peptic ulcer, recurrent gastritis and either gastrectomy or significant GI bleeding, malabsorption syndrome or disease, ileal shunt of any form of intestinal by-pass operation - Hepatic disease - Kidney disease - Significant cardiovascular disease - Clinically abnormal ECG within 2 months of visit 1 - Endocrine disease or disorder - History of hemorrhagic diathesis, agranulocytosis or thrombocytopenia - Any disease that might interfere with evaluations or preclude completion of the trial - Patients with hypersensitivity or intolerance to aspirin, ibuprofen or other NSAIDs - Patients with alcohol abuse, known drug dependency (or a history of) within 2 years prior to trial enrollment - Patients who received an investigational drug within 30 days prior to visit 1 |
| Diclofenac potassium | 75 mg | TID | NR |  |  |  |  |  |
| Diclofenac potassium | 150 mg | TID | NR |  |  |  |  |  |
| Ibuprofen | 1200 mg | TID | NR |  |  |  |  |  |
| N | Lumiracoxib | 100 mg | BID | capsule | RCT, PC, AC, DB, MC, DD | 50 | US, UK, Belgium, DenmarkGermany Hungary Switzerland | 1999 | 28 | - Male or female outpatients aged 18 to 75 years, with knee or hip primary osteoarthritis according to American College of Rheumatology (ACR) criteria  - who had symptoms for at least 3 months - who were either on NSAIDs or simple analgesic therapy, or had a pain intensity of at least 40 mm (VAS) in the affected joint during the last 24 hours. - Females were eligible only if they were not pregnant, non-lactating, and if they were of childbearing potential, agreed to continue to practice birth control. - At randomization patients had to have a pain intensity of at least 40 mm (VAS) in the affected joint during the last 24 hours. | - Patients who had secondary osteoarthritis with history and/or any evidence of the following diseases in the potential target joint: septic arthritis, inflammatory joint disease, gout, recurrent episodes of pseudogout, Paget’s disease of bone, articular fracture, ochronosis, acromegaly, hemochromatosis, Wilson’s disease, primary osteochondromatosis, heritable disorders (e.g. hypermobility), collagen gene mutations - who had open knee or hip surgery within the last year, an arthroscopic surgery or lavage within the last 180 days, or surgery of any kind on the index (target) joint |
| Lumira-coxib | 200 mg | BID | capsule |  |  |  |  |  |
| Lumira-coxib | 400 mg | BID | capsule |  |  |  |  |  |
| Lumira-coxib | 400 mg | OD | capsule |  |  |  |  |  |
| Diclofenac sodium | 150 mg | BID | extended release tablet |  |  |  |  |  |
| Placebo |  |  |  |  |  |  |  |  |
| O | Diclofenac potassium | 100 mg | OD | retard | RCT, AC, DB, MC | 9 | Great Britain and Ireland | 1984 | 28 | - Cooperative out-patients of any age with radiologically confirmed osteoarthritis of the knee and/or hip requiring non-steroidal anti-inflammatory treatment | - History of severe dyspepsia or peptic ulcer,  - Any sensitivity (rash, asthma, rhinorrhoea) to diclofenac, piroxicam, aspirin or paracetamol - Any significant systemic diseases, - A requirement for oral anticoagulant or antidiabetic therapy, - Current use of systemic corticosteroids or local injections of steroids within the previous two months |
| Piroxicam | 20 mg | OD | capsule |  |  |  |  |  |
| P | Diclofenac sodium | 100 mg | OD | slow release | RCT, AC, DB, MC | 2 | Italy | 1983 | 28 | - Women aged over 30 years, with diffuse osteoarthritis, complaining of chronic arthralgia (at least six months in duration) and with a significant degree of functional impairment (overall functional index score > 10=).  - According to a formal psychiatric interview made before the eligibility decision, only patients totaling a Hamilton Depression Rating Scale (HDRS) Score <7 (definitely non-depressed) or >17 (definitely depressed) on first 17 items were admitted to the trial. - Each center had to enroll (12 non-depressed and 12 depressed) 24 patients - Patients had to be in a relapsing phase of the disease and to have discontinued previous anti-rheumatic therapy one week before the beginning of the trial. | - Treatment with antidepressant agents in the last 2 weeks - Glaucoma, epilepsy, severe cardiac, renal or hepatic failure - Pregnancy and lactation - Peptic ulcer - Hypersensitivity to the drugs under evaluation - Doubtful depressive state: (HDRS score 7-17) |
| Clomipramine | 75 mg | OD | slow release |  |  |  |  |  |
| Diclofenac sodium + Clomipramine | 100 mg + 75 mg | OD | slow release |  |  |  |  |  |
| Placebo |  |  |  |  |  |  |  |  |
| Q | Diclofenac sodium | 100 mg | OD | SR | RCT, AC, DB, SC | 1 | Italy | 1985 | 28 | - OA of the hip and/or knee, confirmed radiologically. - At least moderate nocturnal pain (sleep disturbances due to pain at least one time per night). - At least moderate joint soreness on pressure and/or movement (slight limitation of movements of extreme flexion/extension because of pain). | - Pregnancy, lactation - Anticoagulant therapy - Proven or suspected peptic ulcer - Ulcerative colitis - Heart failure and/or severe kidney failure - Known hypersensitivity to drugs in the study |
| Piroxicam | 20 mg | OD | tablet |  |  |  |  |  |
| Indomethacin | 75 mg | TID | capsule |  |  |  |  |  |
| Naproxen | 750 mg | TID | capsule |  |  |  |  |  |
| R | Diclofenac sodium | 100 mg | OD | slow release | RCT, AC, DB, MC | 30 | US | 1990 | 84 | - Male and female outpatients between 40 and 75 years old with OA of the knee - Had to have definite OA of the knee and had to be receiving aspirin or other NSAIDs on a continuing basis for at least 3 months prior to enrollment in the trial.  - Patients receiving physiotherapy were eligible provided their program was not changed during the trial. | - Patients with arthritis of any other etiology were excluded from the trial - Persons who were either candidates for joint replacement surgery or who had partial or total replacement of the joint to be evaluated, were excluded from the trial. |
| Diclofenac sodium | 200 mg | BID | slow release |  |  |  |  |  |
| Diclofenac sodium | 200 mg | QID | enteric coated |  |  |  |  |  |
| S | Diclofenac sodium | 100 mg | OD | sustained release tablet | RCT, AC, DB, SC | 1 | Mexico | 1986 | 56 | - Degenerative joint disease (ARA criteria) - Adult patients ages 18-60 years - Patients who are not using nonsteroidal anti-inflammatory drugs or who have stopped using such a drug at least one week before entering the study - Patients who are willing to participate in the study and are capable of giving informed verbal consent to participate | -Patients with a history of hypersensitivity to acetylsalicylic acid or any other non-hormonal [sic; nonsteroidal] anti-inflammatory agent -Patients who are using or who have used corticosteroids in the last week, or immunosuppressants or gold salts in the last two months -Patients with renal gastroduodenal, liver, hematologic, degenerative, or neoplastic diseases, or any condition which in any way alters the metabolism of the drug |
| Naproxen | 1000mg | BID | capsule |  |  |  |  |  |
| AC, active controlled; DB, double blind; DD, double dummy; DIP, distal interphalangeal joints; ECG, electrocardiogram; GP, general practice; MC, multi-centered; MCP, Metacarpophalangeal; NSAIDs, non-steroidal anti-inflammatory drugs; OA, osteoarthritis; SR, sustained release; VAS, visual analogue scale | | | | | | | | | | | |
