# Supplementary material for: Efficacy and safety of diclofenac in osteoarthritis: Results of a network meta-analysis of unpublished legacy studies
Source: publisher site journal article supplement (doi:10.1016/j.sjpain.2017.03.006), 2017-04-22
Supplement: Supplementary file 7 [file Appendix_5.docx]

Patient characteristics of RCTs included in the NMA

| CSR name | Treatment arms  (dose per day) | ITT  (n) | Mean age  (years) | Male (%) | Type OA | | Mean duration of disease in years | Rescue medication allowed | Discontinuation (%) |
| --- | --- | --- | --- | --- | --- | --- | --- | --- | --- |
| Hip (%) | Knee (%) |
| A | Diclofenac 150 mg | 24 | 60 | 38 | 100 | NR | 11.1 | no | 42 |
|  | Placebo | 22 | 63 | 27 | 100 | NR | 9.3 | no | 55 |
| B | Diclofenac 75 mg | 94 | 65 | 30 | 22 | 53 | NR | no | 20 |
|  | Diclofenac 100 mg | 86 | 67 | 34 | 26 | 59 | NR | no | 20 |
| C | Diclofenac 100 mg | 114 | 63 | 32 | NR | 100 | 8.0 | NR | 22 |
|  | Diclofenac 100 mg | 118 | 61 | 25 | NR | 100 | 8.7 | NR | 22 |
|  | Placebo | 118 | 63 | 31 | NR | 100 | 7.7 | NR | 40 |
| D | Diclofenac 150 mg | 196 | 62 | 36 | NR | 100 | 8.9 | NR | 45 |
|  | Diclofenac 150 mg | 197 | 61 | 30 | NR | 100 | 7.1 | NR | 53 |
|  | Ibuprofen 2400 mg | 197 | 62 | 27 | NR | 100 | 7.3 | NR | 45 |
| E | Diclofenac 150 mg | 94 | 63 | 32 | NR | NR | 8.5 | NR | 21 |
|  | Naproxen 500 mg | 92 | 63 | 27 | NR | NR | 9.7 | NR | 30 |
|  | Placebo | 92 | 63 | 26 | NR | NR | 8.8 | NR | 40 |
| F | Diclofenac 150 mg | 109 | 61 | 22 | NR | 100 | 7.6 | NR | 20 |
|  | Ibuprofen 2400 mg | 110 | 60 | 25 | NR | 100 | 8.0 | NR | 25 |
| G | Diclofenac 150 mg | 73 | 61 | 30 | NR | 100 | 9.2 | NR | 22 |
|  | Placebo | 72 | 60 | 26 | NR | 100 | 9.8 | NR | 57 |
| H | Diclofenac 75 mg | 105 | NR | 36 | 14 | 70 | 4.0 | no | 33 |
|  | Diclofenac 100 mg | 111 | NR | 39 | 14 | 72 | 5.0 | no | 32 |
| I | Diclofenac 100 mg | 30 | 60 | 7 | 13 | 37 | 0.5 | NR | 0 |
|  | Piroxicam 20 mg | 30 | 65 | 33 | 10 | 47 | 0.3 | NR | 0 |
| J | Diclofenac 100 mg | 101 | 63 | 33 | 16 | 44 | 3.0 | yes | 40 |
|  | Piroxicam 20 mg | 98 | 62 | 32 | 12 | 49 | 4.0 | yes | 27 |
| K | Diclofenac 100 mg | 373 | 55 | 45 | 25 | 59 | NR | NR | 15 |
|  | Paracetamol 1950 mg + dextropropoxyphene 195 mg | 382 | 55 | 49 | 27 | 54 | NR | NR | 17 |
| L | Diclofenac 150 mg | 111 | 66 | 24 | NR | NR | NR | yes | 15 |
|  | Naproxen 1000 mg | 113 | 66 | 29 | NR | NR | NR | yes | 11 |
| M | Diclofenac 75 mg | 345 | 63 | 25 | NR | NR | NR | no | 24 |
|  | Diclofenac 150 mg | 184 | 63 | 31 | NR | NR | NR | no | 32 |
|  | Ibuprofen 1200 mg | 350 | 63 | 31 | NR | NR | NR | no | 31 |
| N | Diclofenac 150 mg | 94 | 60 | 32 | NR | NR | 6.3 | yes | 17 |
|  | Placebo | 97 | 61 | 33 | NR | NR | 8.0 | yes | 12 |
| O | Diclofenac 100 mg | 89 | 60 | 43 | 34 | 66 | NR | yes | 17 |
|  | Piroxicam 20 mg | 87 | 61 | 49 | 40 | 59 | NR | yes | 8 |
| P | Diclofenac 100 mg | 23 | 61 | 0 | NR | NR | 12.6 | no | 22 |
|  | Placebo | 22 | 59 | 0 | NR | NR | 11.0 | yes | 14 |
| Q | Diclofenac 100 mg | 10 | 55 | 0 | 45 | 55 | 2.9 | NR | 0 |
|  | Piroxicam 20 mg | 10 | 52 | 10 | 60 | 40 | 4.5 | NR | 10 |
|  | Indomethacin 75 mg | 9 | 47 | 0 | 60 | 40 | 2.3 | NR | 10 |
|  | Naproxen 750 mg | 10 | 54 | 30 | 30 | 70 | 3.0 | NR | 0 |
| R | Diclofenac 100 mg | 131 | 62 | 31 | NR | 100 | 9.2 | no | 35 |
|  | Diclofenac 200 mg | 129 | 64 | 27 | NR | 100 | 8.1 | no | 34 |
|  | Diclofenac 200 mg | 132 | 63 | 33 | NR | 100 | 7.7 | no | 28 |
| S | Diclofenac 100 mg | 22 | 61 | 5 | NR | NR | 10.2 | NR | NR |
|  | Naproxen 1000 mg | 24 | 66 | 13 | NR | NR | 7.5 | NR | NR |
| **Weighted average** |  | **112** | **61** | **32** | **26** | **79** | **7.4** | **n/a** | **27** |

*CSR, clinical study report; ITT, Intention-To-Treat; n/a, not applicable; NR, not reported; OA, osteoarthritis*
