# Supplementary material for: Efficacy and safety of diclofenac in osteoarthritis: Results of a network meta-analysis of unpublished legacy studies
Source: publisher site journal article supplement (doi:10.1016/j.sjpain.2017.03.006), 2017-04-22
Supplement: Supplementary file 9 [file Appendix_7.docx]

A. Expected rank, probability of being the best and expected absolute results - Pain (VAS) CFB at 2 weeks

| Intervention | | |
| --- | --- | --- |
| Diclofenac 150 mg | rank | 1 |
| P(best) | 72.2% |
| Absolute effect | -23.4 |
| 95% CrL | (-31.9; -14.6) |
| Ibuprofen 2400 mg | rank | 2 |
| P(best) | 18.4% |
| Absolute effect | -22.1 |
| 95%CrL | (-31.1; -12.8) |
| Diclofenac 100 mg | rank | 3 |
| P(best) | 5.4% |
| Absolute effect | -17.1 |
| 95% CrL | (-19.5; -14.7) |
| Diclofenac 75 mg | rank | 4 |
| P(best) | 3.9% |
| Absolute effect | -15.7 |
| 95% CrL | (-19.3; -12.1) |
| Placebo | rank | 5 |
| P(best) | 0.0% |
| Absolute effect | -6.6 |
| 95% CrL | (-12.2; -1.0) |

B. Expected rank, probability of being the best and expected absolute results - Pain (VAS) CFB at 4 weeks

| Intervention | | |
| --- | --- | --- |
| Diclofenac 150 mg | rank | 2 |
| P(best) | 44.4% |
| Absolute effect | -29.0 |
| 95% CrL | (-36.7; -24.5) |
| Ibuprofen 2400 mg | rank | 2 |
| P(best) | 17.3% |
| Absolute effect | -27.4 |
| 95% CrL | (-36.8; -18.5) |
| Diclofenac 75 mg | rank | 5 |
| P(best) | 1.5% |
| Absolute effect | -24.0 |
| 95% CrL | (-29.6; -18.2) |
| Diclofenac 100 mg | rank | 5 |
| P(best) | 1.3% |
| Absolute effect | -23.9 |
| 95% CrL | (-26.2; -21.6) |
| Piroxicam 20 mg | rank | 6 |
| P(best) | 6.7% |
| Absolute effect | -22.8 |
| 95% CrL | (-31.2; -14.5) |
| Diclofenac 200 mg | rank | 6 |
| P(best) | 4.4% |
| Absolute effect | -22.7 |
| 95% CrL | (-29.6; -15.8) |
| Naproxen 750 mg | rank | 8 |
| P(best) | 13.6% |
| Absolute effect | -20.0 |
| 95% CrL | (-37.6; -2.4) |
| Paracetamol 1950 mg + dextropropoxyphene 195 mg | rank | 8 |
| P(best) | 0.8% |
| Absolute effect | -19.6 |
| 95% CrL | (-26.8; -12.5) |
| Ibuprofen 1200 mg | rank | 8 |
| P(best) | 0.2% |
| Absolute effect | -19.4 |
| 95% CrL | (-27.9; -11.0) |
| Indomethacin 75 mg | rank | 9 |
| P(best) | 9.9% |
| Absolute effect | -18.1 |
| 95% CrL | (-36.3; 0.1) |
| Placebo | rank | 10 |
| P(best) | 0.0% |
| Absolute effect | -16.7 |
| 95% CrL | (-23.6; -9.8) |

C. Expected rank, probability of being the best and expected absolute results- Pain (VAS) CFB at 12 weeks

| Intervention | | |
| --- | --- | --- |
| Diclofenac 200 mg | rank | 1 |
| P(best) | 63.4% |
| Absolute effect | -27.0 |
| 95% CrL | (-31.4; -22.5) |
| Diclofenac 150 mg | rank | 2 |
| P(best) | 28.0% |
| Absolute effect | -25.1 |
| 95% CrL | (-31.3; -18.8) |
| Diclofenac 100 mg | rank | 3 |
| P(best) | 3.1% |
| Absolute effect | -23.8 |
| 95% CrL | (-25.9; -21.7) |
| Ibuprofen 2400 mg | rank | 4 |
| P(best) | 4.6% |
| Absolute effect | -22.0 |
| 95% CrL | (-29.9; -14.0) |
| Diclofenac 75 mg | rank | 4 |
| P(best) | 0.6% |
| Absolute effect | -22.1 |
| 95% CrL | (-26.0; -18.2) |
| Ibuprofen 1200 mg | rank | 6 |
| P(best) | 0.0% |
| Absolute effect | -19.1 |
| 95% CrL | (-24.6; -13.5) |
| Placebo | rank | 7 |
| P(best) | 0.2% |
| Absolute effect | -16.3 |
| 95% CrL | (-22.9; -9.7) |

D. Expected rank, probability of being the best and expected absolute results- PGA (VAS) at 4 weeks

| Intervention | | |
| --- | --- | --- |
| Diclofenac 150 mg | rank | 1 |
| P(best) | 54.0% |
| Absolute effect | -21.3 |
| 95% CrL | (-26.1; -16.6) |
| Diclofenac 200 mg | rank | 2 |
| P(best) | 32.4% |
| Absolute effect | -20.0 |
| 95% CrL | (-23.9; -16.1) |
| Ibuprofen 2400 mg | rank | 3 |
| P(best) | 10.8% |
| Absolute effect | -19.7 |
| 95% CrL | (-25.3; -14.0) |
| Diclofenac 100 mg | rank | 4 |
| P(best) | 2.8% |
| Absolute effect | -18.5 |
| 95% CrL | (-20.4; -16.5) |
| Diclofenac 75 mg | rank | 5 |
| P(best) | 0.1% |
| Absolute effect | -16.5 |
| 95% CrL | (-19.9; -13.2) |
| Ibuprofen 1200 mg | rank | 6 |
| P(best) | 0.0% |
| Absolute effect | -12.8 |
| 95% CrL | (-17.4; -8.1) |
| Placebo | rank | 7 |
| P(best) | 0.0% |
| Absolute effect | -9.0 |
| 95% CrL | (-13.7; -4.3) |

E. Expected rank, probability of being the best and expected absolute results- PGA (VAS) at 12 weeks

| Intervention |  |  |
| --- | --- | --- |
| Diclofenac 200 mg | rank | 1 |
| P(best) | 92.3% |
| Absolute effect | -25.3 |
| 95% CrL | (-29.5; -21.1) |
| Diclofenac 150 mg | rank | 3 |
| P(best) | 5.5% |
| Absolute effect | -19.4 |
| 95% CrL | (-25.2; -13.5) |
| Diclofenac 100 mg | rank | 3 |
| P(best) | 0.2% |
| Absolute effect | -19.4 |
| 95% CrL | (-21.4; -17.5) |
| Ibuprofen 2400 mg | rank | 5 |
| P(best) | 1.7% |
| Absolute effect | -16.7 |
| 95% CrL | (-24.2; -9.2) |
| Diclofenac 75 mg | rank | 5 |
| P(best) | 0.0% |
| Absolute effect | -16.4 |
| 95% CrL | (-20.0; -12.8) |
| Placebo | rank | 6 |
| P(best) | 0.2% |
| Absolute effect | -14.4 |
| 95% CrL | (-20.7; -8.2) |
| Ibuprofen 1200 mg | rank | 6 |
| P(best) | 0.1% |
| Absolute effect | -15.4 |
| 95% CrL | (-20.6; -10.1) |

F. Expected rank, probability of being the best and expected absolute results- IGA (VAS) at 4 weeks

| Intervention | | |
| --- | --- | --- |
| Diclofenac 150 mg | rank | 1 |
| P(best) | 58.7% |
| Absolute effect | -18.6 |
| 95% CrL | (-26.7; -10.5) |
| Ibuprofen 2400 mg | rank | 2 |
| P(best) | 15.7% |
| Absolute effect | -17.4 |
| 95% CrL | (-26.0; -8.9) |
| Diclofenac 200 mg | rank | 3 |
| P(best) | 21.9% |
| Absolute effect | -15.5 |
| 95% CrL | (-18.4; -12.7) |
| Diclofenac 100 mg | rank | 4 |
| P(best) | 3.8% |
| Absolute effect | -14.3 |
| 95% CrL | (-16.3; -12.4) |
| Placebo | rank | 5 |
| P(best) | 0.0% |
| Absolute effect | -7.9 |
| 95% CrL | (-12.6; -3.2) |

G. Expected rank, probability of being the best and expected absolute results- Withdrawals due to all causes

| Intervention |  |  |
| --- | --- | --- |
| Naproxen 750 mg | rank | 1 |
| P(best) | 52.5% |
| Absolute effect | 0.67 |
| 95% CrL | (0.02; 5.51) |
| Piroxicam 20 mg | rank | 2 |
| P(best) | 21.8% |
| Absolute effect | 0.93 |
| 95% CrL | (0.61; 1.39) |
| Naproxen 1000 mg | rank | 4 |
| P(best) | 9.2% |
| Absolute effect | 1.26 |
| 95% CrL | (0.55; 2.85) |
| Diclofenac 200 mg | rank | 4 |
| P(best) | 2.0% |
| Absolute effect | 1.31 |
| 95% CrL | (0.89; 1.93) |
| Diclofenac 75 mg | rank | 5 |
| P(best) | 0.7% |
| Absolute effect | 1.38 |
| 95% CrL | (0.99; 1.91) |
| Diclofenac 100 mg | rank | 6 |
| P(best) | 0.0% |
| Absolute effect | 1.48 |
| 95% CrL | (1.19; 1.77) |
| Indomethacin 75 mg | rank | 7 |
| P(best) | 13.4% |
| Absolute effect | 1.59 |
| 95% CrL | (0.19; 9.31) |
| Paracetamol 1950 mg + dextropropoxyphene 195 mg | rank | 8 |
| P(best) | 0.2% |
| Absolute effect | 1.64 |
| 95% CrL | (1.11; 2.42) |
| Ibuprofen 2400 mg | rank | 8 |
| P(best) | 0.1% |
| Absolute effect | 1.64 |
| 95% CrL | (1.07; 2.52) |
| Ibuprofen 1200 mg | rank | 9 |
| P(best) | 0.0% |
| Absolute effect | 1.74 |
| 95% CrL | (1.16; 2.58) |
| Diclofenac 150 mg | rank | 9 |
| P(best) | 0.0% |
| Absolute effect | 1.71 |
| 95% CrL | (1.19; 2.46) |
| Naproxen 500 mg | rank | 11 |
| P(best) | 0.1% |
| Absolute effect | 2.18 |
| 95% CrL | (1.24; 3.75) |
| Placebo | rank | 13 |
| P(best) | 0.0% |
| Absolute effect | 2.71 |
| 95% CrL | (1.94; 3.74) |

H. Expected rank, probability of being the best and expected absolute results- Withdrawals due to adverse events

| Intervention |  |  |
| --- | --- | --- |
| Naproxen 750 mg | rank | 2 |
| P(best) | 43.6% |
| Absolute effect | 0.33 |
| 95%CrL | (0.01; 2.77) |
| Placebo | rank | 3 |
| P(best) | 16.6% |
| Absolute effect | 0.38 |
| 95%CrL | (0.19; 0.72) |
| Naproxen 500 mg | rank | 4 |
| P(best) | 14.6% |
| Absolute effect | 0.47 |
| 95%CrL | (0.13; 1.52) |
| Piroxicam 20 mg | rank | 4 |
| P(best) | 9.1% |
| Absolute effect | 0.44 |
| 95%CrL | (0.25; 0.75) |
| Ibuprofen 2400 mg | rank | 6 |
| P(best) | 1.4% |
| Absolute effect | 0.60 |
| 95%CrL | (0.26; 1.30) |
| Naproxen 1000 mg | rank | 7 |
| P(best) | 4.0% |
| Absolute effect | 0.65 |
| 95%CrL | (0.22; 1.85) |
| Diclofenac 75 mg | rank | 8 |
| P(best) | 0.1% |
| Absolute effect | 0.70 |
| 95%CrL | (0.37; 1.25) |
| Indomethacin 75 mg | rank | 9 |
| P(best) | 9.9% |
| Absolute effect | 0.79 |
| 95%CrL | (0.09; 4.76) |
| Diclofenac 200 mg | rank | 9 |
| P(best) | 0.5% |
| Absolute effect | 0.75 |
| 95%CrL | (0.42; 1.36) |
| Paracetamol 1950 mg +  dextropropoxyphene 195 mg | rank | 9 |
| P(best) | 0.1% |
| Absolute effect | 0.78 |
| 95%CrL | (0.48; 1.26) |
| Ibuprofen 1200 mg | rank | 9 |
| P(best) | 0.1% |
| Absolute effect | 0.77 |
| 95%CrL | (0.38; 1.53) |
| Diclofenac 100 mg | rank | 9 |
| P(best) | 0.0% |
| Absolute effect | 0.75 |
| 95%CrL | (0.57; 0.94) |
| Diclofenac 150 mg | rank | 11 |
| P(best) | 0.0% |
| Absolute effect | 0.87 |
| 95%CrL | (0.43; 1.67) |

I. Expected rank, probability of being the best and expected absolute results- Withdrawals due to lack of efficacy

| Intervention |  |  |
| --- | --- | --- |
| Diclofenac 200 mg | rank | 1 |
| P(best) | 78.5% |
| Absolute effect | 0.13 |
| 95%CrL | (0.05; 0.31) |
| Piroxicam 20 mg | rank | 3 |
| P(best) | 9.7% |
| Absolute effect | 0.27 |
| 95%CrL | (0.11; 0.60) |
| Diclofenac 100 mg | rank | 3 |
| P(best) | 1.6% |
| Absolute effect | 0.25 |
| 95%CrL | (0.18; 0.35) |
| Paracetamol 1950 mg + dextropropoxyphene 195 mg | rank | 4 |
| P(best) | 6.4% |
| Absolute effect | 0.32 |
| 95%CrL | (0.12; 0.87) |
| Diclofenac 75 mg | rank | 4 |
| P(best) | 3.5% |
| Absolute effect | 0.29 |
| 95%CrL | (0.16; 0.52) |
| Diclofenac 150 mg | rank | 6 |
| P(best) | 0.3% |
| Absolute effect | 0.39 |
| 95%CrL | (0.21; 0.71) |
| Ibuprofen 1200 mg | rank | 7 |
| P(best) | 0.0% |
| Absolute effect | 0.53 |
| 95%CrL | (0.25; 1.10) |
| Naproxen 500 mg | rank | 8 |
| P(best) | 0.0% |
| Absolute effect | 0.68 |
| 95%CrL | (0.30; 1.49) |
| Ibuprofen 2400 mg | rank | 8 |
| P(best) | 0.0% |
| Absolute effect | 0.62 |
| 95%CrL | (0.30; 1.26) |
| Placebo | rank | 10 |
| P(best) | 0.0% |
| Absolute effect | 1.05 |
| 95%CrL | (0.61; 1.79) |

J. Expected rank and probability of being the best - Serious adverse events

| Intervention |  |  |
| --- | --- | --- |
| Ibuprofen 2400 mg | rank | 2 |
| P(best) | 47.1% |
| Absolute effect | 0.06 |
| 95%CrL | (0.00; 1.06) |
| Diclofenac 150 mg | rank | 3 |
| P(best) | 6.7% |
| Absolute effect | 0.08 |
| 95%CrL | (0.00; 1.36) |
| Diclofenac 75 mg | rank | 4 |
| P(best) | 12.2% |
| Absolute effect | 0.10 |
| 95%CrL | (0.00; 2.34) |
| Ibuprofen 1200 mg | rank | 4 |
| P(best) | 4.8% |
| Absolute effect | 0.12 |
| 95%CrL | (0.00; 2.75) |
| Diclofenac 100 mg | rank | 5 |
| P(best) | 16.7% |
| Absolute effect | 0.14 |
| 95%CrL | (0.07; 0.24) |
| Placebo | rank | 5 |
| P(best) | 5.4% |
| Absolute effect | 0.18 |
| 95%CrL | (0.05; 0.54) |
| Diclofenac 200 mg | rank | 6 |
| P(best) | 7.2% |
| Absolute effect | 0.19 |
| 95%CrL | (0.09; 0.41) |
