# Supplementary material for: Efficacy and safety of diclofenac in osteoarthritis: Results of a network meta-analysis of unpublished legacy studies
Source: publisher site journal article supplement (doi:10.1016/j.sjpain.2017.03.006), 2017-04-22
Supplement: Supplementary file 10 [file Appendix_8.docx]

**Scenario analyses on relative efficacy of diclofenac 150 and 100 mg**

| Relative efficacy of diclofenac 150 mg versus other comparators | Placebo | | Naproxen 750 mg | | Ibuprofen 1200 mg | | Ibuprofen 2400 mg | |
| --- | --- | --- | --- | --- | --- | --- | --- | --- |
| Scenario 1 (exclusion of CSR C) | Diff CFB  (95% CrI) | Probability  Di 150 mg better | Diff CFB  (95% CrI) | Probability  Di 150 mg better | Diff CFB  (95% CrI) | Probability  Di 150 mg better | Diff CFB  (95% CrI) | Probability  Di 150 mg better |
| Pain VAS 2 w | −16.7  (−25.4; −8.0) | >99% | NA | NA | NA | NA | −0.8  (-5.5; 4.6) | 63% |
| Pain VAS 4 w | −14.1  (−23.7; −4.6) | >99% | −6.7  (−27.5; 14.2) | 74% | −9.0  (−17.0; −1.1) | 99% | −1.6  (−6.7; 4.0) | 73% |
| Pain VAS 12 w | NA | NA | NA | NA | −6.0  (−13.4; 1.5) | 95% | −3.1  (−10.2; 3.9) | 82% |
| PGA VAS 4 w | −15.3  (−22.4; −8.1) | >99% | NA | NA | −8.0  (−12.3; −3.7) | >99% | −1.6  (−4.7; 1.4) | 85% |
| PGA VAS 12 w | 0.1  (−196.5; 196.1) | 50% | NA | NA | −4.0  (−8.5; 0.6) | 96% | −2.7  (−7.4; 2.1) | 87% |
| IGA VAS 4 w | −10.4  (−115.4; 101.8) | 58% | NA | NA | −10.7  (−17.4; −4.0) | >99% | -1.2  (−3.9; 1.6) | 80% |
| Scenario 2 (separation of diclofenac salts), results for diclofenac sodium | | | | | | | | |
| Pain VAS 2 w | −16.0  −21.4; −10.4) | >99% | NA | NA | NA | NA | −0.1  (−3.5; 3.2) | 53% |
| Pain VAS 4 w | −14.0  (−21.0; −7.1) | >99% | −10.4  (−98.2; 70.3) | 60% | −3.3  (−10.1; 3.4) | 84% | −0.2  (−3.8; 3.3) | 54% |
| Pain VAS 12 w | NA | NA | NA | NA | −6.1  −13.5; 1.4) | 95% | −3.2  (−9.0; 2.5) | 86% |
| PGA VAS 4 w | −15.3  −22.4; −8.1) | >99% | NA | NA | −6.2  (−12.3; −0.2) | 98% | −0.9  (−4.5; 2.7) | 69% |
| PGA VAS 12 w | NA | NA | NA | NA | −3.2  (−14.1; 7.5) | 74% | −2.3  −10.4; 5.6) | 73% |
| IGA VAS 4 w | −10.7  (−17.4; −4.0) | >99% | NA | NA | NA | NA | 0.1  −5.8; 6.0) | 49% |
| Relative efficacy of diclofenac 100 mg versus other comparators |  |  |  |  |  |  |  |  |
| Scenario 1 (exclusion of CSR C) | Diff CFB  (95% CrI) | Probability  Di 100 mg better | Diff CFB  (95% CrI) | Probability  Di 100 mg better | Diff CFB  (95% CrI) | Probability  Di 100 mg better | Diff CFB  (95% CrI) | Probability  Di 100 mg better |
| Pain VAS 2 w | −18.2  (−113.7; 89.4) | 64% | NA | NA | NA | NA | −2.1  (−97.6; 105.3) | 52% |
| Pain VAS 4 w | −10.8  (−24.8; 3.1) | 94% | −3.4  (−21.7; 14.7) | 64% | −5.7  (−15.8; 4.2) | 88% | 1.8  (−9.7; 13.3) | 37% |
| Pain VAS 12 w | NA | NA | NA | NA | −4.8  (−14.0; 4.3) | 87% | −1.8  (−13.7; 9.8) | 63% |
| PGA VAS 4 w | −14.1  (−23.4; −4.6) | >99% | NA | NA | −6.7  (−12.4; −1.2) | 99% | −0.4  (−7.3; 6.4) | 54% |
| PGA VAS 12 w | 0.1  (−196.1; 196.0) | 50% | NA | NA | −4.0  (−9.8; 1.7) | 92% | −2.7  (−10.6; 5.2) | 75% |
| IGA VAS 4 w | −0.2  (−112.9; 104.9) | 50% | NA | NA | NA | NA | 9.3  (−103.0; 114.4) | 43% |
| Scenario 2 (separation of diclofenac salts), results for diclofenac sodium | | | | | | | | |
| Pain VAS 2 w | −10.5  (−16.1; 4.9) | >99% | NA | NA | NA | NA | 5.3  (−3.2; 13.9) | 11% |
| Pain VAS 4 w | −6.0  (−12.6; 0.6) | 96% | −2.3  (−89.5; 78.1) | 52% | 4.7  −6.6; 16.0) | 21% | 7.8  (−2.0; 17.8) | 16% |
| Pain VAS 12 w | NA | NA | NA | NA | NA | NA | NA | NA |
| PGA VAS 4 w | −8.0  −13.6; -2.4) | >99% | NA | NA | 1.0  (−9.9; 11.9) | 43% | 6.3  (-−3.5; 16.1) | 10% |
| PGA VAS 12 w | NA | NA | NA | NA | NA | NA | NA | NA |
| IGA VAS 4 w | −6.5  (−11.6; −1.3) | 99% | NA | NA | NA | NA | 4.3  (−6.0; 14.6) | 21% |

NA: Not Available, Di: Diclofenac, CFB: change from baseline, CrI: credible interval, VAS: visual analogue scale, PGA: patient global assessment, IGA: investigator global assessment, w: week, diff: difference

Pain, PGA and IGA VAS are in mm.
