# Supplementary material for: Efficacy and safety of diclofenac in osteoarthritis: Results of a network meta-analysis of unpublished legacy studies
Source: publisher site journal article supplement (doi:10.1016/j.sjpain.2017.03.006), 2017-04-22
Supplement: Supplementary file 11 [file Appendix_9.docx]

**A. Adverse events summary by SOC level (1)**

|  | **Gastrointestinal disorders** | | | **Nervous system disorders** | | | **Respiratory, thoracic and mediastinal disorders** | | | **General disorders and administration site conditions** | | | **Musculoskeletal and connective tissue disorders** | | | **Skin and subcutaneous tissue disorders** | | | **Renal and urinary disorders** | | | **Infections and infestations** | | | **Cardiac disorders** | | | **Psychiatric disorders** | | | **Investigations** | | |
| --- | --- | --- | --- | --- | --- | --- | --- | --- | --- | --- | --- | --- | --- | --- | --- | --- | --- | --- | --- | --- | --- | --- | --- | --- | --- | --- | --- | --- | --- | --- | --- | --- | --- |
| **Treatment arms** | **n** | **py** | **n per 100 py** | **n** | **py** | **n per 100 py** | **n** | **py** | **n per 100 py** | **n** | **py** | **n per 100 py** | **n** | **py** | **n per 100 py** | **n** | **py** | **n per 100 py** | **n** | **py** | **n per 100 py** | **n** | **py** | **n per 100 py** | **n** | **py** | **n per 100 py** | **n** | **py** | **n per 100 py** | **n** | **py** | **n per 100 py** |
| **Placebo** | **140** | **63** | **222** | **105** | **63** | **167** | **95** | **63** | **151** | **59** | **65** | **91** | **40** | **63** | **63** | **27** | **63** | **43** | **29** | **63** | **46** | **24** | **63** | **38** | **12** | **63** | **19** | **9** | **63** | **14** | **5** | **36** | **14** |
| **Naproxen 500 mg** | **38** | **18** | **211** | **14** | **18** | **78** | **15** | **18** | **83** | **14** | **18** | **78** | **7** | **18** | **39** | **10** | **18** | **56** | **4** | **18** | **22** | **0** | **18** | **0** | **0** | **18** | **0** | **1** | **18** | **6** | **0** | **18** | **0** |
| **Naproxen 750 mg** | **4** | **1** | **400** | **0** | **1** | **0** | **0** | **0** | **NA** | **0** | **1** | **0** | **0** | **0** | **NA** | **0** | **0** | **NA** | **0** | **0** | **NA** | **0** | **0** | **NA** | **0** | **0** | **NA** | **0** | **0** | **NA** | **0** | **0** | **NA** |
| **Naproxen 1000 mg** | **225** | **27** | **833** | **41** | **31** | **132** | **59** | **27** | **219** | **56** | **31** | **181** | **21** | **27** | **78** | **26** | **31** | **84** | **23** | **27** | **85** | **8** | **27** | **30** | **9** | **27** | **33** | **8** | **27** | **30** | **13** | **27** | **48** |
| **Ibuprofen 1200 mg** | **148** | **80** | **185** | **99** | **80** | **124** | **131** | **80** | **164** | **110** | **80** | **138** | **43** | **80** | **54** | **56** | **80** | **70** | **39** | **80** | **49** | **25** | **80** | **31** | **16** | **80** | **20** | **7** | **80** | **9** | **2** | **80** | **3** |
| **Ibuprofen 2400 mg** | **310** | **107** | **290** | **101** | **107** | **94** | **101** | **107** | **94** | **117** | **107** | **109** | **56** | **107** | **52** | **32** | **107** | **30** | **37** | **107** | **35** | **31** | **107** | **29** | **35** | **107** | **33** | **17** | **107** | **16** | **11** | **107** | **10** |
| **Piroxicam 20 mg** | **48** | **31** | **155** | **27** | **31** | **87** | **0** | **7** | **0** | **63** | **31** | **203** | **0** | **0** | **NA** | **1** | **30** | **3** | **0** | **7** | **0** | **0** | **0** | **NA** | **0** | **0** | **NA** | **0** | **0** | **NA** | **0** | **0** | **NA** |
| **Indomethacin 75 mg** | **0** | **1** | **0** | **6** | **1** | **600** | **0** | **0** | **NA** | **1** | **1** | **100** | **0** | **0** | **NA** | **0** | **0** | **NA** | **0** | **0** | **NA** | **0** | **0** | **NA** | **0** | **0** | **NA** | **0** | **0** | **NA** | **0** | **0** | **NA** |
| **Paracetamol 1950 mg + dextropropoxyphene 195 mg** | **164** | **29** | **566** | **139** | **29** | **479** | **11** | **29** | **38** | **107** | **29** | **369** | **6** | **29** | **21** | **12** | **29** | **41** | **3** | **29** | **10** | **0** | **29** | **0** | **6** | **29** | **21** | **12** | **29** | **41** | **0** | **29** | **0** |
| **Diclofenac 75 mg** | **226** | **103** | **219** | **109** | **103** | **106** | **173** | **103** | **168** | **97** | **125** | **78** | **69** | **103** | **67** | **51** | **103** | **50** | **32** | **103** | **31** | **21** | **103** | **20** | **18** | **79** | **23** | **17** | **103** | **17** | **23** | **103** | **22** |
| **Diclofenac 100 mg** | **637** | **170** | **375** | **238** | **173** | **138** | **224** | **145** | **154** | **222** | **195** | **114** | **49** | **138** | **36** | **41** | **172** | **24** | **45** | **145** | **31** | **26** | **138** | **19** | **7** | **112** | **6** | **35** | **138** | **25** | **28** | **85** | **33** |
| **Diclofenac 150 mg** | **1042** | **301** | **346** | **354** | **301** | **118** | **333** | **301** | **111** | **310** | **301** | **103** | **212** | **301** | **70** | **151** | **301** | **50** | **117** | **301** | **39** | **100** | **301** | **33** | **68** | **301** | **23** | **54** | **301** | **18** | **94** | **301** | **31** |
| **Diclofenac 200 mg** | **314** | **60** | **523** | **89** | **60** | **148** | **131** | **60** | **218** | **94** | **60** | **157** | **66** | **60** | **110** | **28** | **60** | **47** | **23** | **60** | **38** | **28** | **60** | **47** | **12** | **60** | **20** | **10** | **60** | **17** | **1** | **60** | 2 |

**B. Adverse events summary by SOC level (2)**

|  | **Metabolism and nutrition disorders** | | | **Blood and lymphatic system disorders** | | | **Eye disorders** | | | **Vascular disorders** | | | **Injury, poisoning and procedural complications** | | | **Reproductive system and breast disorders** | | | **Ear and labyrinth disorders** | | | **Surgical and medical procedures** | | | **Hepatobiliary disorders** | | | **Immune system disorders** | | | **Neoplasms benign, malignant and unspecified (incl cysts and polyps)** | | | **Endocrine disorders** | | |
| --- | --- | --- | --- | --- | --- | --- | --- | --- | --- | --- | --- | --- | --- | --- | --- | --- | --- | --- | --- | --- | --- | --- | --- | --- | --- | --- | --- | --- | --- | --- | --- | --- | --- | --- | --- | --- |
| **Treatment arms** | **n** | **py** | **n per 100 py** | **n** | **py** | **n per 100 py** | **n** | **py** | **n per 100 py** | **n** | **py** | **n per 100 py** | **n** | **py** | **n per 100 py** | **n** | **py** | **n per 100 py** | **n** | **py** | **n per 100 py** | **n** | **py** | **n per 100 py** | **n** | **py** | **n per 100 py** | **n** | **py** | **n per 100 py** | **n** | **py** | **n per 100 py** | **n** | **py** | **n per 100 py** |
| **Placebo** | **7** | **33** | **21** | **0** | **7** | **0** | **5** | **36** | **14** | **9** | **63** | **14** | **7** | **60** | **12** | **10** | **33** | **30** | **3** | **60** | **5** | **0** | **0** | **NA** | **1** | **52** | **2** | **7** | **52** | **13** | **3** | **34** | **9** | **1** | **18** | **6** |
| **Naproxen 500 mg** | **12** | **18** | **67** | **0** | **0** | **NA** | **0** | **18** | **0** | **0** | **18** | **0** | **2** | **18** | **11** | **0** | **18** | **0** | **0** | **18** | **0** | **0** | **0** | **NA** | **0** | **18** | **0** | **1** | **18** | **6** | **0** | **0** | **NA** | **1** | **18** | **6** |
| **Naproxen 750 mg** | **0** | **0** | **NA** | **0** | **0** | **NA** | **0** | **1** | **0** | **0** | **0** | **NA** | **0** | **0** | **NA** | **0** | **0** | **NA** | **0** | **0** | **NA** | **0** | **0** | **NA** | **0** | **0** | **NA** | **0** | **0** | **NA** | **0** | **0** | **NA** | **0** | **0** | **NA** |
| **Naproxen 1000 mg** | **6** | **27** | **22** | **10** | **27** | **37** | **6** | **27** | **22** | **1** | **27** | **4** | **5** | **27** | **19** | **0** | **27** | **0** | **4** | **27** | **15** | **1** | **27** | **4** | **2** | **27** | **7** | **4** | **27** | **15** | **0** | **27** | **0** | **0** | **0** | **NA** |
| **Ibuprofen 1200 mg** | **5** | **80** | **6** | **1** | **80** | **1** | **2** | **80** | **3** | **7** | **80** | **9** | **6** | **80** | **8** | **9** | **80** | **11** | **7** | **80** | **9** | **4** | **80** | **5** | **1** | **80** | **1** | **1** | **80** | **1** | **5** | **80** | **6** | **0** | **0** | **NA** |
| **Ibuprofen 2400 mg** | **15** | **107** | **14** | **12** | **90** | **13** | **4** | **107** | **4** | **15** | **107** | **14** | **8** | **90** | **9** | **7** | **107** | **7** | **7** | **107** | **7** | **11** | **107** | **10** | **0** | **90** | **0** | **9** | **90** | **10** | **1** | **107** | **1** | **2** | **90** | **2** |
| **Piroxicam 20 mg** | **0** | **0** | **NA** | **0** | **0** | **NA** | **1** | **8** | **13** | **0** | **0** | **NA** | **0** | **0** | **NA** | **0** | **0** | **NA** | **0** | **0** | **NA** | **0** | **0** | **NA** | **0** | **0** | **NA** | **0** | **0** | **NA** | **0** | **0** | **NA** | **0** | **0** | **NA** |
| **Indomethacin 75 mg** | **0** | **0** | **NA** | **0** | **0** | **NA** | **1** | **1** | **100** | **0** | **0** | **NA** | **0** | **0** | **NA** | **0** | **0** | **NA** | **0** | **0** | **NA** | **0** | **0** | **NA** | **0** | **0** | **NA** | **0** | **0** | **NA** | **0** | **0** | **NA** | **0** | **0** | **NA** |
| **Paracetamol 1950 mg + dextropropoxyphene 195 mg** | **2** | **29** | **7** | **0** | **0** | **NA** | **0** | **0** | **NA** | **1** | **29** | **3** | **0** | **0** | **NA** | **2** | **29** | **7** | **0** | **29** | **0** | **0** | **0** | **NA** | **0** | **0** | **NA** | **0** | **0** | **NA** | **0** | **0** | **NA** | **0** | **0** | **NA** |
| **Diclofenac 75 mg** | **3** | **103** | **3** | **8** | **79** | **10** | **7** | **103** | **7** | **13** | **103** | **13** | **6** | **103** | **6** | **10** | **103** | **10** | **10** | **103** | **10** | **3** | **103** | **3** | **0** | **103** | **0** | **2** | **103** | **2** | **2** | **79** | **3** | **0** | **0** | **NA** |
| **Diclofenac 100 mg** | **9** | **85** | **11** | **1** | **30** | **3** | **3** | **64** | **5** | **4** | **138** | **3** | **4** | **109** | **4** | **4** | **85** | **5** | **7** | **138** | **5** | **7** | **56** | **13** | **11** | **79** | **14** | **9** | **109** | **8** | **1** | **83** | **1** | **0** | **0** | **NA** |
| **Diclofenac 150 mg** | **45** | **298** | **15** | **30** | **255** | **12** | **30** | **301** | **10** | **28** | **301** | **9** | **26** | **281** | **9** | **21** | **298** | **7** | **20** | **298** | **7** | **14** | **265** | **5** | **14** | **273** | **5** | **10** | **273** | **4** | **19** | **272** | **7** | **4** | **198** | **2** |
| **Diclofenac 200 mg** | **3** | **60** | **5** | **13** | **60** | **22** | **7** | **60** | **12** | **9** | **60** | **15** | **9** | **60** | **15** | **2** | **60** | **3** | **2** | **60** | **3** | **9** | **60** | **15** | **0** | **0** | **NA** | **4** | **60** | **7** | **1** | **60** | **2** | **0** | **0** | **NA** |

*NA, not available; py, person year*
